# Supplementary material for: Mg / Ca and δ 18 O in living planktic foraminifers from the Caribbean, Gulf of Mexico and Florida Straits
Source: Copernicus journal article supplement (doi:10.5194/bg-2018-176), 2018-04-23
Supplement: Supplementary file [file bg-2018-176-AC1-supplement.pdf]

We kindly thank Takashi Toyofuku for the positive feedback, very constructive and thoughtful comments, which greatly helped to improve our manuscript. Below you find our responses to each point which was addressed and how we incorporated all suggestions in our revised manuscript. Referee comments are written in italics and the respective answers are given in normal font in blue.

Yours sincerely

Anna Jentzen and on behalf of all co-authors

### **Answers to referee 1: T. Toyofuku**

#### Question:

*The authors pointed out the importance of carbonate ion concentration in the introduction section (P1L33) and show the vertical profile of carbonate ion concentration (Fig. 4), although the influence of carbonate ion concentration on neither oxygen/carbon isotopic ratio nor Mg/Ca has not been discussed. The carbonate ion concentration profile shows the most steep change in the surface layer from 0-400m, but perhaps this variability did not affect the paleoenvironmental analysis with core-top samples? In fact, the authors compare between living samples and fossil samples, which are in good agreement. Perhaps, in the field samples, fluctuations by carbonate ion concentration have already been incorporated, so does that mean it will work well without consideration about carbonate ion concentration? Since reviewers are worked through laboratory culture experiments, the factors that pH, carbonate ion concentration fluctuations, etc. in addition to water temperature and salinity influence the shell element / isotope composition cannot be ignored. Under what conditions does carbonate ion concentration need not be taken into consideration?*

Answer: We agree to the referee that the effect of the carbonate ion concentration on foraminiferal tests has not been discussed enough in our first version. We added further information on this topic (including suggested literature) in Chapter 2.5 (P5L2 to P5L17). We don't think that the carbonate ion concentration can be ignored and we believe that it plays an important role for the interpretation of element/isotope compositions of foraminiferal tests. This is the reason why we use the corrected Mg/Ca values for fossil tests from the sediments below 2500 m water depth, according to Regenberg et al. (2009), based on the study of Regenberg et al. (2006, Effect of  $\Delta[\text{CO}_3^{2-}]$  on foraminiferal tests from the Caribbean Sea.)

#### *Minor comments:*

The authors can include Zeebe, Richard E. *Geochimica et Cosmochimica Acta* 63.13- 14 (1999): 2001-2007 was good because it is an important literature as well as Spero et al. (1997) and Bijma et al. (1999).

Answer: We thank the referee for the suggested literature and we added it to our manuscript.

Definition of Vital effects in this research, the reviewer highly appreciated that the vital effect is finely verified. Is it possible to explicitly specify the Vital effect assumed by this research in an introduction or section 3.2 by dividing it into elements (eg ontogenic effect, symbiotic effect, calcification depth, ecology including optimal season / annual cycle etc)? The authors discuss about the influence of each of these factors, but it is rather enumerative.

Answer: We thank the referee for this comment on the vital effect, which we now discuss in more detail in the introduction (P1L35–L37; P2L9–L12).

# Mg/Ca and $\delta^{18}\text{O}$ in living planktic foraminifers from the Caribbean, Gulf of Mexico and Florida Straits

Anna Jentzen<sup>1,a</sup>, Dirk Nürnberg<sup>1</sup>, Ed C. Hathorne<sup>1</sup>, Joachim Schönfeld<sup>1</sup>

<sup>1</sup>GEOMAR Helmholtz Centre for Ocean Research Kiel, Wischhofstrasse 1–3, 24148 Kiel, Germany

5 <sup>a</sup>now at: Max Planck Institute for Chemistry, Hahn-Meitner-Weg 1, 55128 Mainz, Germany

Correspondence to: Anna Jentzen (anna.jentzen@mpic.de)

**Abstract.** Past ocean temperatures and salinities **can be** approximated from combined stable oxygen isotopes ( $\delta^{18}\text{O}$ ) and Mg/Ca measurements in fossil foraminiferal tests with **varying success**. To further refine this approach, we collected living planktic foraminifers by net sampling and pumping of seasurface waters from the Caribbean Sea, the eastern Gulf of Mexico, and Florida Straits. Analyses of  $\delta^{18}\text{O}$  and Mg/Ca in eight living planktic species (*Globigerinoides sacculifer*, *Orbulina universa*, *Neogloboquadrina dutertrei*, *Pulleniatina obliquiloculata*, *Globorotalia menardii*, *Globorotalia unguolata*, *Globorotalia truncatulinoides* and *Globorotalia tumida*) were compared to measured in situ properties of the ambient seawater (temperature, salinity and  $\delta^{18}\text{O}_{\text{seawater}}$ ) and fossil tests of underlying surface sediments. “Vital effects” such as symbiont activity and test growth cause  $\delta^{18}\text{O}$  disequilibria **with respect** to the ambient seawater and a large scatter in foraminiferal Mg/Ca. Overall, ocean temperature is the most prominent environmental influence on  $\delta^{18}\text{O}_{\text{calcite}}$  and Mg/Ca. Enrichment of the heavier  $^{18}\text{O}$  isotope in living specimens below the mixed layer and in fossil tests are clearly related to lowered in situ temperatures and gametogenic calcification. Mg/Ca-based temperature estimates of *G. sacculifer* indicate seasonal maximum accumulation rates on the seafloor in early spring (March) at Caribbean stations and later in the year (May) in the Florida Straits, related to the respective mixed layer temperatures of  $\sim 26^\circ\text{C}$ . Notably, *G. sacculifer* reveals a **weak** positive linear relationship between foraminiferal derived  $\delta^{18}\text{O}_{\text{seawater}}$  estimates and both measured in situ  $\delta^{18}\text{O}_{\text{seawater}}$  and salinity. Our results affirm the applicability of existing  $\delta^{18}\text{O}$  and Mg/Ca calibrations for the reconstruction of past ocean temperatures and  $\delta^{18}\text{O}_{\text{seawater}}$  reflecting salinity due to the convincing accordance of proxy data in both living and fossil foraminifers, and in situ environmental parameters. Large “vital effects” and seasonally varying proxy signals, however, need to be taken into account.

## 1 Introduction

Calcite tests of planktic foraminifers are precipitated from the surrounding seawater and their stable oxygen isotope compositions ( $\delta^{18}\text{O}_{\text{calcite}}$ ) and Mg/Ca ratios are established proxies to reconstruct past ocean conditions (e.g. Erez and Luz, 1983; Nürnberg et al., 2000). The  $\delta^{18}\text{O}_{\text{calcite}}$  signature depends on the ambient seawater temperatures and oxygen isotopic compositions ( $\delta^{18}\text{O}_{\text{seawater}}$ ) the planktic organism is thriving in. Their relationship was defined in several  $\delta^{18}\text{O}$ -paleotemperature equations (e.g. Erez and Luz, 1983; Bouvier-Soumagnac and Duplessy, 1985; Bemis et al., 1998). Earlier studies showed that  $\delta^{18}\text{O}_{\text{calcite}}$  reveals an offset to the equilibrium of the seawater, caused by environmental factors (e.g. salinity, carbonate ion concentration  $[\text{CO}_3^{2-}]$ , ocean pH) and/or biological controlled processes, so-called “vital-effects” (Weiner and Dove, 2003) (e.g. symbionts photosynthesis, respiration) as influencing factors (Spero and Lea, 1993; Spero et al., 1997; Bemis et al., 1998; Bijma et al., 1999). **Symbiont activity, for example, causes a depletion of  $\delta^{18}\text{O}_{\text{calcite}}$  (e.g. Spero and Lea, 1993). Different ontogenetic stages of the foraminifers result in variable stable isotopes ( $\delta^{18}\text{O}_{\text{calcite}}$  and  $\delta^{13}\text{C}_{\text{calcite}}$ ), whereas higher  $\delta^{18}\text{O}_{\text{calcite}}$  and  $\delta^{13}\text{C}_{\text{calcite}}$  values are measured in tests of adult specimens (e.g. Spero and Lea, 1996).**

The ratios of Mg/Ca in foraminiferal tests are predominantly controlled by ocean temperature. Meanwhile, robust planktic species-specific calibrations exist (e.g. Nürnberg, 1995; Nürnberg et al., 1996; Lea et al., 1999; Anand et al., 2003; Regenberg et al., 2009), which allow to reconstruct the thermal structure of the entire water column, even on timescales of millions of years. The incorporation of magnesium during calcification is largely driven by physiological processes, which may cause Mg/Ca heterogeneity in single tests with high and low Mg-bands in some species (Erez, 2003; Sadekov et al., 2005; Bentov and Erez, 2006; Hathorne et al., 2009; Spero et al., 2015). Further, environmental parameters (e.g. salinity, [CO<sub>3</sub><sup>2-</sup>], ocean pH) may affect foraminiferal Mg/Ca (Nürnberg et al., 1996; Lea et al., 1999; Russel et al., 2004; Kisakürek et al., 2008). Most critical for proxy users are carbonate dissolution processes that considerably lower Mg/Ca in foraminiferal tests (Brown and Elderfield, 1996; Rosenthal et al., 2000; Regenberg et al., 2006). Other influencing aspects, such as variable calcification depths (e.g. vertical migration through the water column during the life cycle of individuals; see Lohmann and Schweitzer, 1990; Schiebel and Hemleben, 2017) or variable seasonal abundances play a major role for the interpretation of stable isotope and Mg/Ca signals of planktic foraminifers (e.g. Tedesco et al., 2007).

Whilst, relatively few geochemical studies (e.g. Mg/Ca) have been conducted on recent/living planktic foraminifers, either collected from the water column or cultured under controlled laboratory conditions, these studies are important for assessing different controlling factors on  $\delta^{18}\text{O}_{\text{calcite}}$  and Mg/Ca during biomineralization (e.g. Kahn, 1979; Erez and Honjo, 1981; Nürnberg et al., 1996; Lea et al., 1999; Russel et al., 2004; Kisakürek et al., 2008; Spero et al., 2015).

Here we systematically sampled the upper water column of the Caribbean, the eastern Gulf of Mexico, and Florida Straits for living tropical and subtropical planktic foraminifers using plankton nets and on board pumping devices.  $\delta^{18}\text{O}_{\text{calcite}}$  and Mg/Ca analyses within bulk calcite and single chambers of living specimens collected from different depth intervals were i) related to ocean parameters (temperature, salinity,  $\delta^{18}\text{O}_{\text{seawater}}$ ) measured in water samples from CTD sampling stations nearby, and ii) compared to fossil counterparts from underlying or nearby surface sediments. Our integrated approach aims to evaluate (i) “vital-effects” under natural conditions, (ii) the ontogenetic development in particular test growth and (iii) the impact of environmental conditions on foraminiferal  $\delta^{18}\text{O}_{\text{calcite}}$  and Mg/Ca to further substantiate their potential as paleoceanographic proxies.

## 2 Material and Methods

### 2.1 Sampling and preparation of planktic foraminifers

Analyses were performed on living foraminifers sampled from plankton nets, pumping from below the ship, and fossil foraminifers from surface sediments obtained during cruises SO164 (RV *Sonne*) in May/June 2002 (Nürnberg et al., 2003) and M78/1 (RV *Meteor*) in February/March 2009 (Schönfeld et al., 2011) (Fig. 1; Table 1). To collect living planktic foraminifers, the Hydrobios Midi multiple opening-closing plankton net (MSN) with a mesh size of 100  $\mu\text{m}$  was deployed at five stations in different water depth intervals (surface to max. 400 m) (Table 1). Further sampling of living specimens was accomplished by pumping seawater from 3.5 m water depth during ship’s transit and subsequent filtering over a 63  $\mu\text{m}$  sieve (PF samples). Immediately after sampling, the plankton samples (MSN and PF) were preserved in a mix of 50 % ethanol and seawater. The MSN samples were stained with Rose Bengal (2 g/l). Surface sediment samples were recovered by Multicorer and USNEL giant box corer at positions close to the MSN stations (Table 1). During cruise M78/1, salinity and temperature were recorded by the RBR XR-420 Conductivity-Temperature-Depth (CTD) profiler and by the shipboard thermosalinograph (Fig. 2). For stable isotope analyses in seawater ( $\delta^{18}\text{O}_{\text{seawater}}$ ), water samples were collected at different water depths (Table 1) with the shipboard rosette Niskin bottle system connected to the CTD profiler, filled in glass bottles (100 ml) and poisoned with 0.2 ml HgCl<sub>2</sub> to prevent biological activity.

In the laboratory (GEOMAR, Kiel), the plankton net samples were rinsed with tap water and all foraminifers were picked wet with a glass pipette. The picked foraminifers were dried on a filter paper at room temperature, fractionated into different

mesh sizes (100–125, 125–150, 150–250, 250–300, 300–400, 400–500 and >500 µm) and identified on species level after Bé (1967) and Schiebel and Hemleben (2017). For isotope and geochemical analyses, individual tests from eight different species were selected including: *Globigerinoides sacculifer* (i.e., *Trilobatus sacculifer*; Spezzaferri et al., 2015) with a spherical last chamber (*G. trilobus* morphotype), *Orbulina universa*, *Neogloboquadrina dutertrei*, *Pulleniatina obliquiloculata*, *Globorotalia menardii*, *Globorotalia unguolata*, *Globorotalia truncatulinoides* dextral, and *Globorotalia tumida* (Supplement S5). Only test size fractions >250 µm and cytoplasm-bearing specimens with an intact calcite test were considered for analyses, indicating that the foraminifers were still alive when collected. For all species, the weighted average living depth (m) and habitat (=living) temperature (°C) (temperature at the weighted average living depth) was calculated based on standing stocks (individual m<sup>-3</sup>) in the water column (Table 2; cf. Jentzen et al., 2018).

Surface sediment samples were freeze-dried, wet sieved using tap water over a 63 µm sieve, and dried at 40 °C. Single intact tests were picked from the 355–400 µm size fraction, to be directly comparable with published data from similar Caribbean station sites (existing δ<sup>18</sup>O<sub>calcite</sub> data from Steph et al., 2009 and Mg/Ca data from Regenberg et al., 2006).

## 2.2 Stable isotope analyses

Depending on the selected species and size fraction, a varying number of specimens were analysed for stable isotopes (δ<sup>18</sup>O<sub>calcite</sub> and δ<sup>13</sup>C<sub>calcite</sub>) (cf. Supplement S1). Prior to the measurements, the foraminiferal tests were cracked and the remaining cytoplasm was removed with a needle. The measurements were run on a ThermoScientific MAT 253 mass spectrometer connected to an automatic carbonate preparation device Kiel CARBO IV at GEOMAR. The stable isotope results are reported relative to the Vienna Pee Dee Belemnite (V-PDB) in per mil (‰) and calibrated versus the National Bureau of Standards (NBS) 19. The in house standard (Solnhofen limestone) run multiple times and after every ten measurements with every magazine of samples and gives a long-term analytic precision of <0.06 ‰ (±1σ) for δ<sup>18</sup>O<sub>calcite</sub> and <0.03 ‰ (±1σ) for δ<sup>13</sup>C<sub>calcite</sub>, respectively.

Stable oxygen isotopes in seawater (δ<sup>18</sup>O<sub>seawater</sub>) were analysed by the Isotope Ratio Infrared Spectroscopy (IRIS) analyser (Picarro Model L1102-i CRDS) at the laboratory of GeoZentrum Nordbayern (Erlangen) (Van Geldern and Barth, 2012). The measurements are expressed in per mil (‰) versus the Vienna Standard Mean Ocean Water (VSMOW). The analytical precision is better than 0.05 ‰ (±1σ).

The difference between the predicted inorganic calcite δ<sup>18</sup>O signal of the seawater (calcite formed in thermodynamic equilibrium, δ<sup>18</sup>O<sub>equilibrium</sub>) and the δ<sup>18</sup>O<sub>calcite</sub> value of the foraminifer is commonly termed the “vital effect” (δ<sup>18</sup>O<sub>disequilibrium</sub>) (Table 2):

$$\delta^{18}\text{O}_{\text{disequilibrium}} = \delta^{18}\text{O}_{\text{calcite}} - \delta^{18}\text{O}_{\text{equilibrium}} \quad (1)$$

To determine δ<sup>18</sup>O<sub>equilibrium</sub> (Fig. 3a), the temperature equation of Kim and O’Neil (1997) for inorganic precipitation was applied follow the relationship after Wilke et al. (2006):

$$\delta^{18}\text{O}_{\text{equilibrium}} = 25.778 - 3.333 * (43.704 + T)^{0.5} + \delta^{18}\text{O}_{\text{seawater}} \quad (2)$$

with in situ temperatures (°C) measured during cruise M78/1 by CTD and measured seawater (δ<sup>18</sup>O<sub>seawater</sub>) values (Schönfeld et al., 2011; Supplement S1). δ<sup>18</sup>O<sub>seawater</sub> was corrected to the V-PDB scale by subtracting 0.27 ‰ after Hut (1987).

## 2.3 Mg/Ca analyses

The ratios of Mg/Ca in foraminiferal calcite were analysed from both bulk samples comprising numerous of tests (on average +/-25 specimens) of a single species, and single specimens, depending on their abundances (cf. Supplement S1). Prior to analyses, the samples were cleaned with a hydrogen peroxide-cleaning step following Barker et al. (2003), which is suggested to be an efficient method to remove the high amount of cytoplasm in live foraminifers (Pak et al., 2004). We

omitted a reductive hydrazine cleaning step as this step is unnecessary for plankton samples. Furthermore, employing only the oxidative cleaning step allows for direct comparison to foraminiferal Mg/Ca from surface sediments, which are treated similarly (Regenberg et al., 2006). For each bulk sample (plankton net and sediment), ~400–800 µg of *G. sacculifer*, *N. dutertrei* and *G. unguolata* from different size fractions were used for analyses (Supplement S1). The tests were gently  
5 crushed between two glass plates, in order to open the chambers, and transferred into a vial. The samples were first rinsed with ultrapure water and ethanol, including an ultrasonic treatment. Then, 250 µl of a NaOH/H<sub>2</sub>O<sub>2</sub> solution (100 µl 30 % H<sub>2</sub>O<sub>2</sub> and 10 ml NaOH) were added to each vial and placed for 20 minutes in a hot water bath (92 °C). For the plankton samples these steps were repeated 1–2 times in order to completely remove the cytoplasm. The samples were subsequently rinsed with ultrapure water. Finally, the tests were leached with 250 µl of HNO<sub>3</sub> (0.001 M). Prior to the element analyses,  
10 the samples were dissolved in HNO<sub>3</sub> (0.075 M). The measurements were performed with an axial-viewing VARIAN 720 Inductively Coupled Plasma-Optical Emission Spectrometer (ICP-OES) at GEOMAR. The data of the measurements were normalised and trend-corrected using the ECRM 752-1 standard (3.761 mmol mol<sup>-1</sup> Mg/Ca; Greaves et al., 2008). The analytic precision is 0.1 mmol mol<sup>-1</sup> (±2σ).

Single chambers of live collected foraminifers were analysed with an Excimer ArF 193 nm laser ablation system, coupled to  
15 an Inductively Coupled Plasma-Mass Spectrometer (ICP-MS Agilent 7500cx) at GEOMAR. Single foraminifers were cleaned with a buffered hydrogen peroxide solution, in a similar way as the bulk samples. Only one specimen was put into a vial to avoid breaking the test during the cleaning process. Each test was rinsed with ultrapure water and ethanol before adding 250 µl of NaOH/H<sub>2</sub>O<sub>2</sub> solution. The samples were then placed in a hot water bath (92 °C) for 20 minutes and rinsed with ultrapure water and ethanol afterwards. Subsequently, the samples were dried at room temperature. The laser ablation  
20 technique allowed us to ablate through the test wall from the outer test surface towards the inner side. Its spot size diameter was focused to 50 and 75 µm. Ablation profiles were carried out on the last four chambers (F to F-3) (Supplement S1). The energy density of the laser was 0.9–2.6 J cm<sup>-2</sup> and a laser repetition rate of 5 and 7 Hz was selected. The following isotopes were measured: <sup>24</sup>Mg, <sup>26</sup>Mg, <sup>27</sup>Al, <sup>43</sup>Ca, <sup>44</sup>Ca, <sup>55</sup>Mn, <sup>66</sup>Zn, <sup>88</sup>Sr, <sup>232</sup>Th and <sup>238</sup>U. The ablation was stopped when the test wall was penetrated. Analyses were calibrated using standard glasses 610 and 612 of National Institute of Standards and  
25 Technology (NIST) using the values of Jochum et al. (2011). The NIST 610 and NIST 612 were ablated with an energy density of 2–3 J cm<sup>-2</sup> after every ten measurements of foraminiferal tests. Raw counts of elements were processed offline and <sup>43</sup>Ca was used as internal standard to account for ablation yield. Outliers (average value ±2σ) were rejected from the results. A powder pellet of JCT-1 (giant clam shell) was used as reference and repeatedly analysed (n=15) during the ablation sessions revealing an average Mg/Ca ratio of 1.21 ± 0.13 mmol mol<sup>-1</sup> (standard deviation of 10.6 %, 1σ) being consistent  
30 with the consensus of solution analyses in many laboratories (Mg/Ca=1.289 mmol mol<sup>-1</sup> Hathorne et al., 2013).

In situ temperatures (°C) measured during cruise M78/1 (Schönfeld et al., 2011) were compared to derived Mg/Ca-temperature estimates. We applied different calibrations for each species to account for species-specific differences (e.g. Russel et al., 2004; Cléroux et al., 2008; Regenberg et al., 2009; cf. Supplement S2).

#### 2.4 Calculation of δ<sup>18</sup>O<sub>seawater</sub>

35 The combination of δ<sup>18</sup>O<sub>calcite</sub> and Mg/Ca in foraminiferal tests allows us to estimate δ<sup>18</sup>O of the ambient seawater (Craig and Gordon, 1965; Schmidt, 1999; Fig. 3b), which is used as a proxy for surface seawater salinity. We compared our measured in situ δ<sup>18</sup>O<sub>seawater</sub> to δ<sup>18</sup>O<sub>seawater</sub> estimates derived from combined foraminiferal δ<sup>18</sup>O<sub>calcite</sub> and Mg/Ca-temperatures of *G. sacculifer*. For the calculation we used the species-specific δ<sup>18</sup>O-paleotemperature equation for *G. sacculifer* of Spero et al. (2003) with the species-specific Mg/Ca-temperature calibration for *G. sacculifer* of Regenberg et al. (2009).

## 2.5 Calcite dissolution

Calcite dissolution can affect foraminiferal Mg/Ca and stable isotopes ( $\delta^{18}\text{O}$  and  $\delta^{13}\text{C}$ ) as a function of the regionally different calcite saturation states in the oceans and the sensitivity of the species-specific test structure (Brown and Elderfield, 1996; Spero et al., 1997; Zeebe, 1999; Bijma et al., 1999; Regenberg et al., 2006; 2014). The calcite saturation state  $\Delta[\text{CO}_3^{2-}]$  is defined as:

$$\Delta[\text{CO}_3^{2-}] = [\text{CO}_3^{2-}]_{in-situ} - [\text{CO}_3^{2-}]_{saturation} \quad (3)$$

and decreases from the surface ( $\sim 150\text{--}200 \mu\text{mol kg}^{-1}$ ) to  $\sim 5000$  m water depth ( $< 0 \mu\text{mol kg}^{-1}$ ) in the eastern Caribbean Sea and Gulf of Mexico (Fig. 4).  $\Delta[\text{CO}_3^{2-}]$  of  $\sim 21 \mu\text{mol kg}^{-1}$ , which is a critical threshold for the onset of selective  $\text{Mg}^{2+}$  ion removal from planktic foraminiferal calcite, is at  $\sim 2500\text{--}3000$  m water depth in the study area. Below this, the undersaturated waters generally lower foraminiferal Mg/Ca through preferential dissolution (Regenberg et al., 2006; 2014). Furthermore, increasing  $[\text{CO}_3^{2-}]$  concentrations and seawater pH cause decreasing  $\delta^{18}\text{O}_{\text{calcite}}$  and  $\delta^{13}\text{C}_{\text{calcite}}$  values of the foraminiferal tests (Spero et al., 1997; Zeebe, 1999; Bijma et al., 1999). As all plankton net samples of this study were taken from shallower than 400 m water depth, the studied living foraminifers originate from supersaturated seawater with respect to calcite ( $\Delta[\text{CO}_3^{2-}] > 50 \mu\text{mol kg}^{-1}$ ) and that substantial  $\text{Mg}^{2+}$  ion removal (loss of higher Mg/Ca calcite) is not to be expected. This is not valid for fossil tests from surface sediments below 2500–3000 m water depth. At these locations (Stations M78/1-220/SO164-22-2 and M78/1-219/SO164-02-3) we use the dissolution corrected Mg/Ca values from Regenberg et al. (2006; 2009) (cf. Supplement 1).

## 3 Results and Discussion

### 3.1 Hydrographical setting during sampling

In order to be able to directly relate our results on vertical foraminiferal distribution patterns and species-specific (isotope) geochemical signatures to the modern hydrographic conditions in the study area, we also took temperature, salinity and  $\delta^{18}\text{O}_{\text{seawater}}$  measurements. The CTD and thermosalinograph data gathered during cruise M78/1 (February–March 2009) reveal low sea surface temperatures (SST) in the Gulf of Mexico ( $\sim 20^\circ\text{C}$ ) and Florida Straits ( $\sim 24^\circ\text{C}$ ) (Fig. 1; 2) comparable to the boreal winter situation (Fig. 2; Locarnini et al., 2013). Hydrographic conditions in the Caribbean vary seasonally with a large range of SSTs (range in the Florida Straits up to  $5^\circ\text{C}$ ) and salinities (SSS; range in the Caribbean Sea up to 1 (psu)) (Fig. 2) and are closely linked to the migrating Intertropical Convergence Zone (ITCZ), which is at its northernmost position ( $6\text{--}10^\circ\text{N}$ ) during summer (Locarnini et al., 2013; Zweng et al., 2013). The surface mixed layer extends to max. 100 m water depth in the Caribbean and is characterised by the relatively fresh Caribbean Water (CW;  $< 36$  psu). The lowest salinity is recorded in the southeastern Caribbean during summer and autumn when the Amazon and Orinoco river discharge is most intense and freshwater plumes arrive in the Caribbean Sea (Wüst, 1964; Müller-Karger et al., 1989; Chérubin and Richardson, 2007). Modified CW is transported via anticyclonic eddies (Loop Current) towards the Gulf of Mexico and Florida Straits (Vukovich, 2007). In the upper thermocline, the highly saline Subtropical Under Water (SUW;  $> 37$  (psu)) prevails. This water mass originates in tropical and subtropical regions (Gallegos, 1996; Blanke et al., 2002) and resides in  $\sim 80\text{--}160$  m water depth. The  $18^\circ\text{C}$  Sargasso Sea Water (Eighteen Degree Water = EDW) prevails in  $\sim 200\text{--}400$  m water depth entering the Caribbean Sea via the passages of the Greater Antilles (Morrison and Nowlin, 1982). The Gulf Common Water ( $\sim 23^\circ\text{C}$  and  $\sim 36.4$  (psu); Vidal et al., 1994) possibly influences the Florida Straits hydrography (Station 210/211) in the upper thermocline at  $100\text{--}150$  m, characterised by low salinity (36.5 (psu)).

Seawater  $\delta^{18}\text{O}$  ( $\delta^{18}\text{O}_{\text{seawater}}$ ) averages to  $\sim 0.9\text{‰}$  (VSMOW) in the uppermost 400 m water depth (Fig. 3a). Highest  $\delta^{18}\text{O}_{\text{seawater}}$  values (1.3 ‰) can be found in the salinity maximum at  $\sim 60\text{--}150$  m water depth, whereas the lowest value (0.3 ‰) is measured in the deepest sample at the lowest salinity. Additionally, the in situ  $\delta^{18}\text{O}_{\text{seawater}}$  and salinity recorded during M78/1



show a positive correlation (linear regression,  $r = 0.81$ ) and yield similar values as earlier data sets from the Caribbean Sea (Schmidt et al., 1999) (Fig. 3b). The  $\delta^{18}\text{O}_{\text{equilibrium}}$  increases with depth from  $\sim -1.5$  to  $1$  ‰ in dependence of the decreasing ocean temperature (Fig. 2; 3a).

### 3.2 Vital effects on foraminiferal $\delta^{18}\text{O}_{\text{calcite}}$

- 5 In order to address the effects of symbiont activity and life cycle on the foraminiferal oxygen isotopes,  $\delta^{18}\text{O}_{\text{calcite}}$  values of living foraminifers were compared to the calculated  $\delta^{18}\text{O}_{\text{equilibrium}}$  of the ambient seawater and  $\delta^{18}\text{O}_{\text{calcite}}$  estimates of fossil tests from underlying surface sediments.

#### 3.2.1 Symbionts and life cycle effect on foraminiferal $\delta^{18}\text{O}$ and $\delta^{13}\text{C}$

Specimens of *G. sacculifer* and *O. universa* from the mixed layer are characterised by large negative  $\delta^{18}\text{O}_{\text{disequilibrium}}$  values of  
10  $-0.35$  ‰ and  $-0.32$  ‰, respectively (Table 2). These two species host dinoflagellates as symbionts (Gastrich, 1987) and similarly negative  $\delta^{18}\text{O}_{\text{disequilibrium}}$  values were reported in spinose, symbiont-bearing species caught in plankton tows from various ocean areas (Table 2 and references therein). Laboratory experiments (Spero, 1992; Spero and Lea, 1993; Bemis et al., 1998) revealed a depletion of  $0.3$  to  $0.6$  ‰ in  $\delta^{18}\text{O}_{\text{calcite}}$  of *O. universa* and *G. sacculifer* under high irradiance levels related to algae photosymbiont activity. In particular, a high irradiance in the euphotic zone intensifies the photosynthetic  
15 rate in the Caribbean Sea under its prevailing oligotrophic conditions (Spero and Parker, 1985; Morel et al., 2010). Enhanced photosymbiont activity increases the  $\text{O}_2$  concentration and fosters  $\text{CO}_2$  fixation, resulting in an elevated pH within the microenvironment around the living foraminifer (Jørgensen et al., 1985; Rink et al., 1998). Both, increasing pH and increasing carbonate ion concentration  $[\text{CO}_3^{2-}]$  apparently cause a depletion of  $\delta^{18}\text{O}_{\text{calcite}}$  (Spero et al., 1997; Bijma et al., 1999).

20 Among all species studied, only *G. sacculifer* and *N. dutertrei* reveal a significant positive correlation (Spearman rank correlation,  $p < 0.05$ ) between test size and stable isotopes ( $\delta^{18}\text{O}_{\text{calcite}}$  and  $\delta^{13}\text{C}_{\text{calcite}}$ ) (Fig. 5, Supplement S3), suggesting that ontogeny affects the isotopic fractionation processes. The species *G. unguolata* shows lower  $\delta^{18}\text{O}_{\text{calcite}}$  values in the test size fraction  $< 300$   $\mu\text{m}$  and *G. menardii* indicate no significant ontogenetic effect ( $p > 0.5$ ; Fig. 5). It should be noted that for some species we did not have enough sample material in all test size classes. However, our results are consistent to Kahn (1979),  
25 Kahn and Williams (1981), Spero and Lea (1996) and Bemis et al. (1998), who postulated that juvenile foraminifers have a larger “vital-effect” than adult individuals, with their tests being depleted of the heavy  $^{18}\text{O}$  and  $^{13}\text{C}$  isotopes due to a higher metabolic rate (incorporation of respired  $\text{CO}_2$ ) and/or rapid growth rate. Rapidly growing calcitic skeletons result in a stronger kinetic isotope fractionation and cause the depletion of heavier  $^{18}\text{O}$  and  $^{13}\text{C}$  isotopes (McConnaughey, 1989).

Vertical migration of planktic species to deeper and colder water masses during their life cycle may additionally affect  
30  $\delta^{18}\text{O}_{\text{calcite}}$ , leading to commonly higher values in adult specimens (Kroon and Darling, 1995; Lončarić et al., 2006; Birch et al., 2013). Samples from the same test size fraction of all species exhibit the enrichment of heavier  $^{18}\text{O}$  isotopes at deeper water levels (Fig. 6; Table 3). We speculate that the increasing  $\delta^{18}\text{O}_{\text{calcite}}$  at deeper water levels is a function of increasing  $\delta^{18}\text{O}_{\text{equilibrium}}$  of the ambient seawater, rather than ontogenetic effects itself. The surface dweller *G. sacculifer* reveals the largest  $\delta^{18}\text{O}_{\text{disequilibrium}}$  value ( $\sim 1$  ‰) in the thermocline (Table 2). As a higher rate of photosynthetic processes in deeper  
35 water depths can be excluded and specimens were still alive when sampled, we suggest that *G. sacculifer* completed calcifying in the thermocline before reproduction. Our observation corroborates South Atlantic plankton net studies of Lončarić et al. (2006), who noted that *G. sacculifer*  $\delta^{18}\text{O}_{\text{calcite}}$  increased with depth in the upper 60 m water depth and remained constant below the surface mixed layer, even though  $\delta^{18}\text{O}_{\text{equilibrium}}$  increased continuously.

### 3.2.2 The $\delta^{18}\text{O}$ offset between living and fossil foraminifers

It becomes evident that almost all fossil tests from surface sediment samples, in particular *N. dutertrei*, *P. obliquiloculata*, *G. truncatulinoides* and *G. tumida* are enriched in  $\delta^{18}\text{O}_{\text{calcite}}$  ( $>0.5\text{‰}$ ) compared to their living counterparts from the water column (Fig. 6; Table 3).  $\delta^{18}\text{O}_{\text{calcite}}$  of fossil shallow dwellers *G. sacculifer* and *O. universa* are rather close to those values of specimens caught in the thermocline (average difference of  $0.14\text{‰}$  and  $0.02\text{‰}$ , respectively) (Table 3). Yet, the overall discrepancy in  $\delta^{18}\text{O}_{\text{calcite}}$  between fossil and living specimens may be best explained by gametogenetic calcification processes or calcite crust formation, which take place during the vertical migration through the water column. At the end of the life cycle and prior to gametogenesis, various planktic foraminifer species (including *G. sacculifer*, *O. universa*, *P. obliquiloculata*, *G. truncatulinoides*, *G. tumida*) add a calcite crust of variable thickness on the outer surface of the test (Schiebel and Hemleben, 2017, and references therein). Based on calculations of Bouvier-Soumagnac and Duplessy (1985) and Hamilton et al. (2008) up to 25 % ( $\sim 4\text{ }\mu\text{g}$ ) gametogenic calcite is added by *O. universa*, which is mainly secreted in colder waters prior to reproduction. The tests thereby lose their glassy and transparent appearances (Bé, 1980; Deuser et al., 1981; Duplessy et al., 1981b; Hemleben et al., 1985; Schweitzer and Lohmann, 1991). Specifically, spinose species resorb their spines before releasing their gametes (Bé and Anderson, 1976; Spero, 1988). These processes result in heavier  $\delta^{18}\text{O}_{\text{calcite}}$  compositions of fossil tests from surface sediments (and even individual foraminifers from sediment traps) (Duplessy et al., 1981b; Bouvier-Soumagnac and Duplessy, 1985; Bouvier-Soumagnac et al., 1986; Lin et al., 2011). Consistently, the heavy  $\delta^{18}\text{O}_{\text{calcite}}$  values in adult specimens of *G. truncatulinoides* and *G. tumida* may be best explained by vertical migration into colder water masses at a late ontogenetic stage (Franco-Fraguas et al., 2011; Birch et al., 2013). Orr (1967) and Vergnaud-Grazzini (1976) recognised that living individuals of *G. truncatulinoides* with a thick test and pustules on the test surface are more likely to be found in deeper water masses than non-ornamented, thin-shelled specimens. As expected, such tests had  $\delta^{18}\text{O}_{\text{calcite}}$  values close to those observed in surface sediments. Overall, our proxy database supports the notion that specimens of *P. obliquiloculata*, *G. tumida* and *G. truncatulinoides* add a thick opaque calcite layer or cortex at deeper water depths than  $\sim 400\text{ m}$ . Hence, the fossil tests are enriched in  $\delta^{18}\text{O}_{\text{calcite}}$  relative to the living foraminifers (up to  $0.85\text{‰}$ ) (Fig. 6; Table 3).

During the sampling campaign in February/March 2009, mainly juvenile specimens of *N. dutertrei* were found in plankton nets (mode test size fraction  $150\text{--}250\text{ }\mu\text{m}$ ; Jentzen et al., 2018). This finding may additionally explain the large  $\delta^{18}\text{O}_{\text{calcite}}$  offset between living foraminifers and fossil tests ( $\sim 1\text{‰}$ ) (Fig. 6; Table 3). Kroon and Darling (1995) recognised that small specimens of *N. dutertrei* have similar  $\delta^{18}\text{O}_{\text{calcite}}$  values as surface dwellers and lower values than large specimens, supporting the notion on the ontogenetic related migration to deeper waters. Fairbanks et al. (1982) and Bouvier-Soumagnac and Duplessy (1985) also noted increasing  $\delta^{18}\text{O}_{\text{calcite}}$  values of *N. dutertrei* with increasing water depth in the Panama Basin and Indian Ocean, suggesting that this species secrete substantial proportions of their tests below the mixed layer. Furthermore, living *N. dutertrei* from the South China Sea were depleted in  $\delta^{18}\text{O}_{\text{calcite}}$  compared to individuals from sediment traps (Lin et al., 2011). Our data confirm these assumptions as we recognised higher  $\delta^{18}\text{O}_{\text{calcite}}$  values and larger individuals of *N. dutertrei* in surface sediments compared to the mixed layer (Fig. 6; Table 3; Jentzen et al., 2018).

The species *G. menardii* show increasing  $\delta^{18}\text{O}_{\text{calcite}}$  values from the mixed layer to the thermocline ( $+0.3\text{‰}$ ), and from the thermocline to the surface sediments ( $+0.2\text{‰}$ ) pointing to decreasing ambient seawater temperatures at deeper water levels and migration within the water column (Fig. 2; Table 3). Apparently, *G. unguolata* is an exception to the rule, as this species does not show the enrichment of  $\delta^{18}\text{O}_{\text{calcite}}$  in fossil tests compared to living specimens (Fig. 6; Table 3). Yet, the species secreted their calcite tests close to the equilibrium with the ambient seawater ( $0.01\text{--}0.08\text{‰}$ ) throughout the water column (Table 2). The average surface sediment  $\delta^{18}\text{O}_{\text{calcite}}$  value corresponds well with the depth where the highest standing stock was observed during the sampling campaign in February/March 2009 (Fig. 6; Jentzen et al., 2018).



### 3.3 Mg/Ca-based ocean temperature assessment from living foraminifers

In order to evaluate Mg/Ca as proxy for seawater temperature, we compared Mg/Ca-temperature estimates of living specimens to (i) measured in situ temperatures and (ii) Mg/Ca-temperature estimates of fossil tests from surface sediments. Within this study, Mg/Ca analyses were performed on bulk foraminiferal samples measured by ICP-OES and single tests measured by LA-ICP-MS. ICP-OES samples of *G. sacculifer*, *N. dutertrei* and *G. unguolata* yield higher Mg/Ca ratios on average compared to LA-ICP-MS samples from the same MSN sample (Table 3). The data indicate a difference of  $0.5 \pm 0.5$  mmol mol<sup>-1</sup> for *G. sacculifer* (average value of eight MSN sampling intervals), 1.2 mmol mol<sup>-1</sup> for *N. dutertrei* (one MSN sampling interval) and  $0.17 \pm 0.05$  mmol mol<sup>-1</sup> for *G. unguolata* (three MSN sampling intervals). We compare the results of both methods to each other having in mind the data discrepancy originating from the different analytical techniques. For LA-ICP-MS only small amounts of foraminiferal calcite from single chambers are analysed and for the ICP-MS the bulk calcite from whole foraminiferal tests are measured.

Our Mg/Ca ratios of eight species collected at specific ocean temperature ranges (corresponding to different water depth intervals) are in good agreement with established species-specific Mg/Ca-temperature calibrations (Fig. 7; cf. Supplement S2), and further support the foraminiferal Mg/Ca-dependency on ambient water temperature. Hence, we estimate Mg/Ca-temperatures applying the best fitting calibration for each species (Fig. 8). Overall, all specimens collected in the surface waters of the eastern Gulf of Mexico (PF samples) yield low Mg/Ca-temperature estimates (averaged  $\sim 20.6$  °C) according to the low early spring temperatures of  $\sim 20$  °C prevailing during cruise M78/1 (Fig. 1). Higher Mg/Ca-temperature estimates ( $\sim 25$  °C) of shallow dwellers (symbiont and facultative symbiont bearing species) in the Florida Straits and Caribbean Sea (MSN samples) point to higher temperatures in the mixed layer ( $> 24$  °C). Low Mg/Ca ratios of deep dwellers (*G. truncatulinoides* and *G. tumida*) in the thermocline follow the decreasing ambient seawater temperatures (Fig. 8).

#### 3.3.1 (Facultative) symbiont bearing species

Our dataset is most complete for *G. sacculifer*, allowing for a detailed comparison between Mg/Ca-based temperature estimates from plankton net and surface sediment samples. In the Caribbean Sea, the estimated Mg/Ca-temperatures for *G. sacculifer* ( $\sim 26$  °C) are consistent with in situ temperatures of the mixed layer ( $\sim 26.2$  °C), the average habitat temperature ( $\sim 26$  °C, derived from the standing stock, Table 2) and Mg/Ca-temperatures derived from fossil tests ( $\sim 26$  °C) (Fig. 8). Below 150 m water depth, the deviation between Mg/Ca-temperature and the ambient seawater temperature increases, which support the former conclusion based on  $\delta^{18}\text{O}_{\text{calcite}}$  that *G. sacculifer* completed calcifying above or within the thermocline. Lower temperature estimates of  $\sim 24$  °C in the Florida Straits (Station 211) (Fig. 7) mirror the generally lower sea surface temperatures of  $\sim 24.6$  °C at this station during cruise M78/1 (Fig. 2). Here the fossil tests from surface sediments yield higher Mg/Ca ratios ( $+0.7$  mmol mol<sup>-1</sup>) than the living specimens. The Mg/Ca-temperature of fossil specimens indicate  $\sim 26.5$  °C, which is rather comparable to temperatures in the Florida Straits of the mixed layer in May (Locarnini et al., 2013, Fig. 2). Foraminiferal census data from the MSN samples suppose that the highest population density of *G. sacculifer*, consequently also the highest flux and accumulation rate of empty tests on the seafloor, appears during early spring in the Caribbean Sea, linking this species to the warm and oligotrophic Caribbean Water (CW) ( $\sim 26$  °C) (Jentzen et al., 2018). Furthermore, high frequencies of *G. sacculifer* are related with the strength of the Loop Current transporting warm Caribbean Water into the Gulf of Mexico (Poore et al., 2013). Therefore, we presume that a higher flux of *G. sacculifer* in Florida Straits is likely to occur later in the year, presumably in May, hence after our sampling, and the fossil tests of *G. sacculifer* from the Caribbean Sea and Florida Straits thereby reflect different seasonal signals.

Beside the seasonal effect, millennial-scale variabilities further affect the Mg/Ca signal of fossil tests from surface sediments. Regenberg et al. (2006) assumed an age range of 2–3 kyrs in surface sediments ( $\sim 0$ –1 cm) of the Caribbean Sea. As such, the surface sediments include the record of earlier climate variations, like the Little Ice Age, when sea surface

temperatures in the Caribbean were cooler by  $\sim 2$  °C (Watanabe et al., 2001). A large scatter of  $\sim 0.9$  mmol mol<sup>-1</sup> Mg/Ca of fossil tests from Caribbean surface sediments was therefore linked partly to past environmental variabilities (Regenberg et al., 2006). Our study, however, shows a similarly large Mg/Ca scatter in living specimens collected from the same plankton nets (MSN samples, Mg/Ca range up to  $\sim 0.87$  mmol mol<sup>-1</sup>; Fig. 7). Furthermore, LA-ICP-MS profiles across single chamber walls reveal a large Mg/Ca variability, with decreasing Mg/Ca values towards the final chamber (F) (cf. Supplement S4), which implies that “vital-effects” drive Mg<sup>2+</sup> incorporation. Earlier studies on surface sediments and culture experiments indicate an ontogenetic effect on the incorporation of Mg<sup>2+</sup> during test growth of *G. sacculifer*, with lowest Mg/Ca ratios in the final, newly precipitated chambers (Sadekov et al., 2005; Dueñas-Bohórquez et al., 2011). Although lower average Mg/Ca ratios ( $\sim 0.3$  mmol mol<sup>-1</sup>) were measured in living specimens than in fossil test, the bulk foraminiferal samples of living *G. sacculifer* from the mixed layer show a significant positive correlation between Mg/Ca and in situ temperatures (Pearson linear,  $r = 0.8$ ,  $p < 0.05$ ), with an overall Mg/Ca scatter comparable to that of fossil specimens from surface sediments (Fig. 7).

Our database for the other species is rather limited. Nonetheless, we can derive the following information. The symbiont bearing species *O. universa* characteristically yields very high Mg/Ca ratios in single tests (up to  $\sim 10$  mmol mol<sup>-1</sup> on average) (cf. Lea et al., 1999; Russel et al., 2004). Mg/Ca-temperature estimates of *O. universa* are on average  $\sim 1$  °C lower than the measured in situ temperature, but show decreasing values in larger depths according to lower in situ temperatures (Fig. 8; Table 3). The offset between Mg/Ca-temperatures of *P. obliquiloculata* and in situ temperatures vary from  $-3$  °C to  $9$  °C. Both, *O. universa* and *P. obliquiloculata* show low and high Mg<sup>2+</sup> bands across single chambers of the tests (Supplement S4). Those bands are likely caused by physiological processes (Eggins et al., 2004; Kunioka et al., 2006; Sadekov et al., 2009; Spero et al., 2015) and reveal a large Mg/Ca variability in single chambers. Single LA-ICP-MS measurements of *N. dutertrei* yield lower Mg/Ca ratios than the ICP-OES measurements (Table 3). Here, the high Mg-heterogeneity in single chambers (cf. Fehrenbacher et al., 2017) probably caused the large offset between the two measuring techniques (see above). However, the average derived Mg/Ca-temperature of plankton bulk samples ( $\sim 26.3$  °C) at station 221 is in good agreement with the in situ temperature of the seawater at this station ( $\sim 26.5$  °C) (Fig. 8). The difference of  $0.71$  mmol mol<sup>-1</sup> Mg/Ca between the living and fossil bulk samples (Table 3) support the notion that adult specimens of *N. dutertrei* dwell at larger depths and continue calcifying (development of a crust; cf. Steinhardt et al., 2015; Fehrenbacher et al., 2017), as indicated by the lower  $\delta^{18}\text{O}_{\text{calcite}}$  values and smaller specimens collected in the upper mixed layer (Jentzen et al., 2018). Living specimens of *G. menardii* yield a Mg/Ca-temperature range between  $\sim 18$  °C and  $26.5$  °C, which is larger but covers the temperature range of fossil tests ( $\sim 23.2$ – $25$  °C) and the calculated average habitat temperature ( $\sim 24.5$  °C; Table 2) in the Florida Straits and Caribbean Sea (Fig. 8). **The high Mg/Ca-temperature estimate in the deep sampling depth interval (Fig. 8) might indicate that *G. menardii* calcify in the upper 250 m water depth.**

### 3.3.2 Symbiont barren species

In the Florida Straits both, bulk and single Mg/Ca measurements of *G. unguolata* yield temperature estimates of  $\sim 24$  °C in the mixed layer and thermocline (Fig. 8) being congruent to the average habitat temperature of  $23.8$  °C during February/March 2009 (Table 2). The average Mg/Ca-temperature estimates of living and fossil *G. truncatulinoides* ( $\sim 19$  °C) mirror the average habitat temperature of  $\sim 20$  °C during February/March 2009 (Fig. 8; Table 2). The deep dweller *G. tumida* shows a decreasing Mg/Ca-temperature trend from the mixed layer to the thermocline following the decreasing in situ temperature (Fig. 8). The fossil tests of *G. tumida* show higher average Mg/Ca ratios than the living individuals (Table 3) and yield higher temperature estimates. However, the Mg/Ca-temperature of fossil tests ( $\sim 19$  °C) represents the calculated average habitat temperature ( $\sim 21.7$  °C) far better than the living foraminifers, which show an offset to the prevailing in situ temperature of  $\sim 7$  °C to  $17$  °C (Fig. 8) most likely due to variable crusting of the chambers (cf. Supplement S4).

### 3.4 $\delta^{18}\text{O}_{\text{seawater}}$ relationship

The combination of foraminiferal  $\delta^{18}\text{O}_{\text{calcite}}$  and Mg/Ca-temperatures to estimate  $\delta^{18}\text{O}_{\text{seawater}}$  approximating paleo-salinity is a commonly accepted approach in paleoceanography (e.g. Lea et al., 2000; Schmidt et al., 2004; Nürnberg et al., 2008). Support derived from living foraminifers collected under natural conditions is still sparse. Our unique dataset on living planktic foraminifers in the mixed layer (>125 m water depth) at least allows us to test the abovementioned approach for the surface dweller *G. sacculifer* from the Caribbean Sea and Florida Straits (Fig. 9). As the  $\delta^{18}\text{O}_{\text{seawater}}$  estimates are strongly depending on both the applied  $\delta^{18}\text{O}$ -paleotemperature equation and empirical Mg/Ca-calibration, we decided to apply the  $\delta^{18}\text{O}$ -paleotemperature equation of Spero et al. (2003). This equation is based on *G. sacculifer* cultured in laboratory, which takes the large disequilibrium of  $\delta^{18}\text{O}_{\text{calcite}}$  in living specimens to the ambient seawater into account (Table 2). For the estimation of Mg/Ca-temperature, we applied the species-specific calibration of Regenberg et al. (2009) for *G. sacculifer* derived from fossil tests of surface sediments in the tropical Atlantic and Caribbean Sea. Our study shows that this calibration reflects our in situ temperatures very close (Fig. 7).  $\delta^{18}\text{O}_{\text{seawater}}$  estimates of *G. sacculifer* show a weak positive linear relationship with in situ  $\delta^{18}\text{O}_{\text{seawater}}$  as well as with salinity for Station 211 and 221 (Fig. 9c; 9d). Station 219 does not show a positive linear relationship between  $\delta^{18}\text{O}_{\text{seawater}}$  estimates of *G. sacculifer* and in situ  $\delta^{18}\text{O}_{\text{seawater}}$  but with salinity (Fig. 9d). The average dataset of all stations shows a weak positive linear relationship (Fig. 9b), however, it is not statistically significant ( $p > 0.05$ ;  $p = 0.074$  for salinity and  $p = 0.069$  for  $\delta^{18}\text{O}_{\text{seawater}}$ , respectively). Additionally, different test-size fractions influence the  $\delta^{18}\text{O}_{\text{seawater}}$  estimates (see 3.2.1 for  $\delta^{18}\text{O}_{\text{calcite}}$ ) and should be taken into account for studies reconstructing past ocean parameters (see Metcalfe et al., 2015). However, our study on living foraminifers hence provides compelling evidence that the combination of foraminiferal  $\delta^{18}\text{O}_{\text{calcite}}$  and Mg/Ca-temperature reflecting ambient seawater properties reliably approximates the modern ocean salinity.

### 4 Conclusions

Our combined stable isotopes ( $\delta^{18}\text{O}$  and  $\delta^{13}\text{C}$ ) and Mg/Ca analyses on living planktic foraminifers, collected by MSN and PF from surface to max. 400 m water depth of the Caribbean Sea, the eastern Gulf of Mexico and Florida Straits, allow for the following conclusions:

- (1) The large negative disequilibrium (between  $\delta^{18}\text{O}_{\text{calcite}}$  and  $\delta^{18}\text{O}_{\text{equilibrium}}$ ) of up to -0.35 ‰ observed for *G. sacculifer* and *O. universa* point to a strong photosynthetic activity of the host symbionts (dinoflagellates).
- (2) Ontogeny most likely controls  $\delta^{18}\text{O}_{\text{calcite}}$  and  $\delta^{13}\text{C}_{\text{calcite}}$  values. In this study *G. sacculifer* and *N. dutertrei* show a significant increase of  $\delta^{18}\text{O}_{\text{calcite}}$  and  $\delta^{13}\text{C}_{\text{calcite}}$  with increasing test size.
- (3) Vertical migration in the water column and additional secretion of a calcite crust or gametogenic calcite (at the end of the foraminiferal life cycle) likely causes the increase of  $\delta^{18}\text{O}_{\text{calcite}}$  with water depths and the enrichment of heavier  $^{18}\text{O}$  isotopes in fossil tests compared to living specimens.
- (4) The large intraspecific scatter of Mg/Ca implies a strong “vital-effect”. Nonetheless, it is evident that the ambient calcification temperature drives the Mg/Ca compositions in foraminiferal tests and causes lowered Mg/Ca derived temperature estimates at lowered in situ temperature.
- (5) The various species-specific datasets agree well to published  $\delta^{18}\text{O}$  and Mg/Ca calibrations.
- (6) Fossil tests of *G. sacculifer* from surface sediments in the Caribbean Sea and Florida Straits suggest that the regional Mg/Ca signatures may be seasonally biased. Mg/Ca values indicate that the highest flux/accumulation rate of *G. sacculifer* occurs during spring (March) in the Caribbean Sea and delayed by a few months in the Florida Straits (most likely in May) linked to prevailing seawater temperatures of ~26 °C in the mixed layer.

(7) Combined  $\delta^{18}\text{O}_{\text{calcite}}$  and Mg/Ca-temperatures of *G. sacculifer* yield  $\delta^{18}\text{O}_{\text{seawater}}$  estimates, which show a **weak** positive linear relationship with measured in situ  $\delta^{18}\text{O}_{\text{seawater}}$  and salinity.

*Supplement.*

- 5 S1 Dataset
- S2 Calibrations
- S3 Statistics
- S4 LA-ICP-MS profiles
- S5 SEM Plate
- 10 **S6 Station plots**

*Data availability.* Dataset of this article can be found in the Supplement and in Jentzen et al. (2018), Regenberg et al. (2006), and Steph et al. (2009).

- 15 *Competing interests.* The authors declare that they have no conflict of interest.

*Acknowledgements.* This study was funded by the German Research Foundation DFG (grant SCHO605/8-1). The authors thank the captain, crew and participants of RV *Sonne* cruise SO164 and RV *Meteor* cruise M78/1. We thank Nadine Gehre for measuring Mg/Ca on bulk samples (ICP-OES), Jan Fietzke and Steffanie Nordhausen for the help during laser ablation measurements and processing the raw data. We would like to thank Fynn Wulf and Sebastian Fessler for measuring the stable isotopes of foraminiferal calcite, Robert van Geldern (GeoZentrum Nordbayern) for measuring stable isotopes of seawater, and Birgit Mohr (Univ. Kiel) for the support with the preparation of scanning electron microscope photographs. **We gratefully thank Lennart de Nooijer for handling the manuscript as well as Takashi Toyofuku and Brett Metcalfe for their constructive comments, which helped to improve the manuscript.**

25 **References**

- Anand, P., Elderfield, H., and Conte, M. H.: Calibration of Mg/Ca thermometry in planktonic foraminifera from a sediment trap time series, *Paleoceanography*, 18, 1050, doi:10.1029/2002PA000846, 2003.
- Barker, S., Greaves, M., and Elderfield, H.: A study of cleaning procedures used for foraminiferal Mg/Ca paleothermometry, *Geochemistry, Geophysics, Geosystems*, 4, 8407, doi:10.1029/2003GC000559, 2003.
- 30 Bé, A. W. H.: Families: Globigerinidae and Globorotaliidae, Fiche no. 108, in: Fiches d'identification du zooplankton, edited by: Frasier, J. H., Conseil International pour l'Exploration de la Mer, 1967.
- Bé, A. W. H.: An ecological, zoogeographic and taxonomic review of recent planktonic foraminifera, in: *Oceanic Micropaleontology*, edited by: Ramsay, A.T.S., Academic Press, London, 1977.
- Bé, A. W. H.: Gametogenic calcification in a spinose planktonic foraminifer, *Globigerinoides sacculifer* (Brady), *Marine*
- 35 *Micropaleontology*, 5, 283–310, 1980.
- Bé, A. W. H., and Anderson, O. R.: Gametogenesis in planktonic foraminifera, *Science*, 192, 890–892, 1976.
- Bentov, S., and Erez, J.: Impact of biomineralization processes on the Mg content of foraminiferal shells: A biological perspective, *Geochemistry, Geophysics, Geosystems*, 7, Q01P08, doi:10.1029/2005GC001015, 2006.
- Bemis, B. E., Spero, H. J., Bijma, J., and Lea, D. W.: Reevaluation of the oxygen isotopic composition of planktonic
- 40 foraminifera: Experimental results and revised paleotemperature equations, *Paleoceanography*, 13, 150–160, doi:10.1029/98PA00070, 1998.

- Bijma, J., Spero, H. J., and Lea, D. W.: Reassessing foraminiferal stable isotope geochemistry: Impact of the oceanic carbonate system (experimental results), in: Use of proxies in paleoceanography, edited by: Fischer, G., and Wefer, G., Springer Berlin, Heidelberg, 489–512, 1999.
- Birch, H., Coxall, H. K., Pearson, P. N., Kroon, D., and O'Regan, M.: Planktonic foraminifera stable isotopes and water column structure: Disentangling ecological signals, *Marine Micropaleontology*, 101, 127–145, 2013.
- 5 Blanke, B., Arhan, M., Lazar, A., and Prévost, G.: A Lagrangian numerical investigation of the origins and fates of the salinity maximum water in the Atlantic, *Journal of Geophysical Research*, 107, 3163, doi:10.1029/2002JC001318, 2002.
- Bouvier-Soumagnac, Y., and Duplessy, J. C.: Carbon and oxygen isotopic composition of planktonic foraminifera from laboratory culture, plankton tows and Recent sediment: implications for the reconstruction of paleoclimatic conditions and of the global carbon cycle, *Journal of Foraminiferal Research*, 15, 302–320, 1985.
- 10 Bouvier-Soumagnac, Y., Duplessy, J. C., and Bé, A. W. H.: Isotopic composition of a laboratory cultured planktonic foraminifer *O. universa*, Implications for paleoclimatic reconstructions, *Oceanologica acta*, 9, 519–522, 1986.
- Brown, S. J., and Elderfield, H.: Variations in Mg/Ca and Sr/Ca ratios of planktonic foraminifera caused by postdepositional dissolution: Evidence of shallow Mg-dependent dissolution, *Paleoceanography*, 11, 543–551, doi:10.1029/96PA01491, 15 1996.
- Chérubin L.M., and Richardson, P.: Caribbean current variability and the influence of the Amazon and Orinoco fresh water plumes, *Deep-Sea Research I*, 54, 1451–1473, 2007.
- Cléroux, C., Cortijo, E., Anand, P., Labeyrie, L., Bassinot, F., Caillon, N., and Duplessy, J.-C.: Mg/Ca and Sr/Ca ratios in planktonic foraminifera: Proxies for upper water column temperature reconstruction, *Paleoceanography*, 23, PA3214, 20 doi:10.1029/2007PA001505, 2008.
- Craig, H., and Gordon, L.I.: Deuterium and oxygen 18 variations in the ocean and the marine atmosphere, in: *Stable Isotopes in Oceanographic Studies and Paleotemperatures*, edited by: Tongiorgi, E., Spoleto, 9–130, 1965.
- Deuser, W. G., Ross, E. H., Hemleben, C., and Spindler, M.: Seasonal changes in species composition, numbers, mass, size, and isotopic composition of planktonic foraminifera settling into the deep Sargasso Sea, *Palaeogeography, Palaeoclimatology, Palaeoecology*, 33, 103–127, 1981.
- 25 Dueñas-Bohórquez, A., da Rocha, R. E., Kuroyanagi, A., de Nooijer, L. J., Bijma, J., and Reichart, G.-J.: Interindividual variability and ontogenetic effects on Mg and Sr incorporation in the planktonic foraminifer *Globigerinoides sacculifer*, *Geochimica et Cosmochimica Acta*, 75, 520–532, 2011.
- Dickson, A. G.: Thermodynamics of the Dissociation of Boric Acid in Synthetic Seawater from 273.15 to 318.15 K, *Deep Sea Research Part A, Oceanographic Research Papers*, 37, 755–766, 1990.
- 30 Dickson, A. G., and Millero, F. J.: A Comparison of the Equilibrium Constants for the Dissociation of Carbonic Acid in Seawater Media, *Deep Sea Research Part A, Oceanographic Research Papers*, 34, 1733–1743, 1987.
- Duplessy, J. C., Bé, A. W. H., and Blanc, P. L.: Oxygen and carbon isotopic composition and biogeographic distribution of planktonic foraminifera in the Indian Ocean, *Palaeogeography, Palaeoclimatology, Palaeoecology*, 33, 9–46, 1981a.
- 35 Duplessy, J. C., Blanc, P. L., and Bé, A. W. H.: Oxygen-18 enrichment of planktonic foraminifera due to gametogenic calcification below the euphotic zone, *Science*, 213, 1247–1250, 1981b.
- Eggins, S. M., Sadekov, A., and De Deckker, P.: Modulation and daily banding of Mg/Ca in *Orbulina universa* tests by symbiont photosynthesis and respiration: a complication for seawater thermometry?, *Earth and Planetary Science Letters*, 225, 411–419, 2004.
- 40 Erez, J.: The source of ions for biomineralization in foraminifera and their implications for paleoceanographic proxies, *Reviews in Mineralogy and Geochemistry*, 54, 115–149, 2003.
- Erez, J., and Honjo, S.: Comparison of isotopic composition of planktonic foraminifera in plankton tows, sediment traps and sediments, *Palaeogeography, Palaeoclimatology, Palaeoecology*, 33, 129–156, 1981.

- Erez, J., and Luz, B.: Experimental paleotemperature equation for planktonic foraminifera, *Geochimica et Cosmochimica Acta*, 47, 1025–1031, 1983.
- Fairbanks, R. G., Sverdrlove, M., Free, R., Wiebe, P. H., and Bé, A. W. H.: Vertical distribution and isotopic fractionation of living planktonic foraminifera from the Panama Basin, *Nature*, 298, 841–844, 1982.
- 5 Fehrenbacher, J.S., Russel, A.D., Davis, C.V., Gagnon, A.C., Spero, H.J., Cliff, J.B., Zhu, Z., and Martin, P.: Link between light-triggered Mg-banding and chamber formation in the planktic foraminifera *Neoglobobulimina dutertrei*, *Nature Communications*, 8, doi: 10.1038/ncomms15441, 2017.
- Franco-Fraguas, P., Costa, K. B., and Toledo, F. A. D. L.: Relationship between isotopic composition ( $\Delta^{18}\text{O}$  and  $\Delta^{13}\text{C}$ ) and planktonic foraminifera test size in core tops from the Brazilian Continental Margin, *Brazilian Journal of Oceanography*, 59, 10 327–338, 2011.
- Gallegos, A.: Descriptive physical oceanography of the Caribbean Sea, in: *Small Islands: Marine Science and Sustainable Development*, edited by: Maul, G.A., Coastal and Estuarine Studies, 36–55, 1996.
- Gastrich, M. D.: Ultrastructure of a new intracellular symbiotic alga found within planktonic foraminifera, *Journal of Phycology*, 23, 623–632, 1987.
- 15 Greaves, M., Caillon, N., Rebaubier, H., Bartoli, G., Bohaty, S., Cacho, I., Clarke, L., Cooper, M., Daunt, C., Delaney, M., deMenocal, P., Dutton, A., Eggins, S., Elderfield, H., Garbe-Schönberg, D., Goddard, E., Green, D., Groeneveld, J., Hastings, D., Hathorne, E., Kimoto, K., Klinkhammer, G., Labeyrie, L., Lea, D. W., Marchitto, T., Martinez-Boti, M. A., Mortyn, P. G., Ni, Y., Nürnberg, D., Paradis, G., Pena, L., Quinn, T., Rosenthal, Y., Russell, A., Sagawa, T., Sosdian, S., Stott, L., Tachikawa, K., Tappa, E., Thunell, R., and Wilson, P. A.: Interlaboratory comparison study of calibration standards 20 for foraminiferal Mg/Ca thermometry, *Geochemistry, Geophysics, Geosystems*, 9, Q08010, doi:10.1029/2008GC001974, 2008.
- Hamilton, C. P., Spero, H. J., Bijma, J., and Lea, D. W.: Geochemical investigation of gametogenic calcite addition in the planktonic foraminifera *Orbulina universa*, *Marine Micropaleontology* 68, 256–267, 2008.
- Hathorne, E. C., James R. H., and Lampitt, R. S.: Environmental versus biomineralization controls on the intratest variation 25 in the trace element composition of the planktonic foraminifera *G. inflata* and *G. scitula*, *Paleoceanography* 24, PA4204, doi:10.1029/2009PA001742, 2009.
- Hathorne, E. C., Gagnon, A., Felis, T., Adkins, J., Asami, R., Boer, W., Caillon, N., Case, D., Cobb, K. M., Douville, E., deMenocal, P., Eisenhauer, A., Garbe-Schönberg, D., Geibert, W., Goldstein, S., Hughen, K., Inoue, M., Kawahata, H., Kölling, M., Cornec, F. L., Linsley, B. K., McGregor, H. V., Montagna, P., Nurhati, I. S., Quinn, T. M., Raddatz, J., 30 Rebaubier, H., Robinson, L., Sadekov, A., Sherrell, R., Sinclair, D., Tudhope, A. W., Wei, G., Wong, H., Wu, H. C., and You, C.-F.: Interlaboratory study for coral Sr/Ca and other element/Ca ratio measurements, *Geochemistry, Geophysics, Geosystems*, 14, 3730–3750, doi:10.1002/ggge.20230, 2013.
- Hemleben, C., Spindler, M., Breiting, I., and Deuser, W. G.: Field and laboratory studies on the ontogeny and ecology of some Globorotaliid species from the Sargasso Sea off Bermuda, *Journal of Foraminiferal Research*, 15, 254–272, 1985.
- 35 Hut, G.: Stable isotope reference samples for geochemical and hydrological investigations, Consultants Group meeting 16-18.09.1985, International Atomic Energy Agency (I.A.E.A.), Vienna, Austria, p. 42, 1987.
- Jansen, H., Zeebe, R. E., and Wolf-Gladrow, D. A.: Modeling the dissolution of settling  $\text{CaCO}_3$  in the ocean, *Global Biogeochemical Cycles*, 16, 1027, doi:10.1029/2000GB001279, 2002.
- Jentzen, A., Schönfeld, J., and Schiebel, R.: Assessment of the effect of increasing temperature on the ecology and 40 assemblage structure of modern planktic foraminifers in the Caribbean and surrounding seas, *Journal of Foraminiferal Research*, 48, 251–272, doi:10.2113/gsjfr.48.3.251, 2018.

- Jochum, K. P., Weis, U., Stoll, B., Kuzmin, D., Yang, Q., Raczek, I., Jacob, D. E., Stracke, A., Birbaum, K., Frick, D. A., Günther, D., and Enzweiler, J.: Determination of reference values for NIST SRM 610–617 glasses following ISO Guidelines, *Geostandards and Geoanalytical Research*, 35, 397–429, 2011.
- Jørgensen, B. B., Erez, J., Revsbech, N. P., and Cohen, Y.: Symbiotic photosynthesis in a planktonic foraminiferan, *Globigerinoids sacculifer* (Brady), studied with microelectrodes, *Limnology and Oceanography*, 30, 1253–1267, doi:10.4319/lo.1985.30.6.1253, 1985.
- Kahn, M. I.: Non-equilibrium oxygen and carbon isotopic fractionation in tests of living planktonic foraminifera, *Oceanologica Acta* 2, 195–208, 1979.
- Kahn, M. I., and Williams, D. F.: Oxygen and carbon isotopic composition of living foraminifera from the northeast Pacific Ocean, *Palaeogeography, Palaeoclimatology, Palaeoecology*, 33, 47–69, 1981.
- Kim, S.-T., and O’Neil, J. R.: Equilibrium and nonequilibrium oxygen isotope effects in synthetic carbonates, *Geochimica et Cosmochimica Acta*, 61, 3461–3475, 1997.
- Kisakürek, B., Eisenhauer, A., Böhm, F., Garbe-Schönberg, D., and Erez, J.: Controls on shell Mg/Ca and Sr/Ca in cultured planktonic foraminiferan, *Globigerinoides ruber* (white), *Earth and Planetary Science Letters*, 273, 260–269, 2008.
- Kroon, D., and Darling, K.: Size and upwelling control of the stable isotope composition of *Neogloboquadrina dutertrei* (d’Orbigny), *Globigerinoides ruber* (d’Orbigny) and *Globigerina bulloides* d’Orbigny: Examples from the Panama Basin and Arabian Sea, *Journal of Foraminiferal Research*, 25, 39–52, 1995.
- Kučera, M.: Planktonic foraminifera as tracers of past oceanic environments, in: *Developments in Marine Geology, Proxies in Late Cenozoic Paleooceanography*, edited: by Hillaire-Marcel, C., and De Vernal, A., Elsevier, New York, 2007.
- Kunioka, D., Shirai, K., Takahata, N., Sano, Y., Toyofuku, T., and Ujiie, Y.: Microdistribution of Mg/Ca, Sr/Ca, and Ba/Ca ratios in *Pulleniatina obliquiloculata* test by using a NanoSIMS: Implication for the vital effect mechanism, *Geochemistry, Geophysics, Geosystems*, 7, Q12P20, doi:10.1029/2006GC001280, 2006.
- Lea, D. W., Mashiotto, T. A., and Spero, H. J.: Controls on magnesium and strontium uptake in planktonic foraminifera determined by live culturing, *Geochimica et Cosmochimica Acta*, 63, 2369–2379, 1999.
- Lea, D. W., Pak, D. K., and Spero, H. J.: Climate impact of late Quaternary equatorial Pacific sea surface temperature variations, *Science*, 289, 1719–1724, 2000.
- Lin, H.-L., Sheu, D. D.-D., Yang, Y., Chou, W.-C., and Hung, G.-W.: Stable isotopes in modern planktonic foraminifera: Sediment trap and plankton tow results from the South China Sea, *Marine Micropaleontology*, 79, 15–23, 2011.
- Locarnini, R. A., Mishonov, A. V., Antonov, J. I., Boyer, T. P., Garcia, H. E., Baranova, O. K., Zweng, M. M., Paver, C. R., Reagan, J. R., Johnson, D. R., Hamilton, M., and Seidov, D.: World Ocean Atlas 2013, Volume 1: Temperature, in: NOAA Atlas NESDIS 73, edited by: Levitus, S., and Mishonov, A., 2013.
- Lohmann, G. P., Schweitzer, P. N.: *Globorotalia truncatulinoides* Growth and chemistry as probes of the past thermocline: 1. Shell size, *Paleoceanography*, 5, 55–75, 1990.
- Lončarić, N., Peeters, F. J. C., Kroon, D., and Brummer, G. J. A.: Oxygen isotope ecology of recent planktic foraminifera at the central Walvis Ridge (SE Atlantic), *Paleoceanography*, 21, PA3009, doi:10.1029/2005PA001207, 2006.
- McConnaughey, T.:  $^{13}\text{C}$  and  $^{18}\text{O}$  isotopic disequilibrium in biological carbonates: I. Patterns, *Geochimica et Cosmochimica Acta* 53, 151–162, 1989.
- Mehrbach, C., Culberson, C. H., Hawley, J. E., and Pytkowicz, R. M.: Measurement of the apparent dissociation-constants of carbonic-acid in seawater at atmospheric pressure, *Limnology and Oceanography*, 18, 897–907, doi:10.4319/lo.1973.18.6.0897, 1973.
- Metcalfe, B., Feldmeijer, W., deVringer-Picon, M., Brummer, G.-J. A., Peeters, F. J. C., Ganssen, G. M.: Late Pleistocene glacial-interglacial shell-size-isotope variability in planktonic foraminifera as function of local hydrography, *Biogeosciences*, 12, 4781–4807, 2015.



- Morel, A., Claustre, H., and Gentili, B.: The most oligotrophic subtropical zones of the global ocean: similarities and differences in terms of chlorophyll and yellow substance, *Biogeosciences*, 7, 3139–3151, doi:10.5194/bg-7-3139-2010, 2010.
- Morrison, J. M., and Nowlin, W. D.: General distribution of water masses within the eastern Caribbean Sea during the winter of 1972 and fall of 1973, *Journal of Geophysical Research*, 87, 4207–4229, doi:10.1029/JC087iC06p04207, 1982.
- Müller-Karger, F. E., McClain, C. R., Fisher, T. R., Esaias, W. E., and Varela, R.: Pigment distribution in the Caribbean Sea: Observations from space, *Progress in Oceanography*, 23, 23–64, 1989.
- Nürnberg, D.: Magnesium in tests of *Neogloboquadrina pachyderma* sinistral from high northern and southern latitudes, *Journal of Foraminiferal Research*, 25, 350–368, 1995.
- 10 Nürnberg, D., Bijma, J., and Hemleben, C.: Assessing the reliability of magnesium in foraminiferal calcite as a proxy for water mass temperatures, *Geochimica et Cosmochimica Acta*, 60, 803–814, 1996.
- Nürnberg, D., Müller, A., and Schneider, R. R.: Paleo-sea surface temperature calculations in the equatorial east Atlantic from Mg/Ca ratios in planktic foraminifera: A comparison to sea surface temperature estimates from  $U_{37}^K$ , oxygen isotopes, and foraminiferal transfer function, *Paleoceanography*, 15, 124–134, doi:10.1029/1999PA000370, 2000.
- 15 Nürnberg, D., Schönfeld, J., Dullo, W. C., and Rühlemann, C.: RV SONNE cruise report SO164 RASTA: Rapid climate changes in the western tropical Atlantic - Assessment of the biogenous and sedimentary record, Balboa-Balboa, May 22 - June 28, 2002, GEOMAR-Report 109, 1–151, 2003.
- Nürnberg, D., Ziegler, M., Karas, C., Tiedemann, R., and Schmidt, M. W.: Interacting Loop Current variability and Mississippi River discharge over the past 400 kyr, *Earth and Planetary Science Letters*, 272, 278–289, 2008.
- 20 Orr, W. N.: Secondary calcification in the foraminiferal genus *Globorotalia*, *Science*, 157, 1554–1555, 1967.
- Pak, D. K., Lea, D. W., and Kennett, J. P.: Seasonal and interannual variation in Santa Barbara Basin water temperatures observed in sediment trap foraminiferal Mg/Ca, *Geochemistry, Geophysics, Geosystems*, 5, Q12008, doi:10.1029/2004GC000760, 2004.
- Pierrot, D., Lewis, E., and Wallace, D. W. R.: MS Excel Program Developed for CO<sub>2</sub> System Calculations. ORNL/CDIAC-25 105a. Carbon Dioxide Information Analysis Center, Oak Ridge National Laboratory, U.S. Department of Energy, Oak Ridge, Tennessee, 2006.
- Poore, R. Z., Tedesco, K. A., and Spear, J. W.: Seasonal flux and assemblage composition of planktic foraminifers from a sediment-trap study in the northern Gulf of Mexico, *Journal of Coastal Research*, 63, 6–19, 2013.
- Regenberg, M., Nürnberg, D., Steph, S., Groeneveld, J., Garbe-Schönberg, D., Tiedemann, R., and Dullo, W. C.: Assessing 30 the effect of dissolution on planktonic foraminiferal Mg/Ca ratios: Evidence from Caribbean core tops, *Geochemistry, Geophysics, Geosystems* 7, Q07P15, doi:10.1029/2005GC001019, 2006.
- Regenberg, M., Steph, S., Nürnberg, D., Tiedemann, R., and Garbe-Schönberg, D.: Calibrating Mg/Ca ratios of multiple planktonic foraminiferal species with  $\delta^{18}O$ -calcification temperatures: Paleothermometry for the upper water column, *Earth and Planetary Science Letters*, 278, 324–336, 2009.
- 35 Regenberg, M., Regenberg, A., Garbe-Schönberg, D., and Lea, D. W.: Global dissolution effects on planktonic foraminiferal Mg/Ca ratios controlled by the calcite-saturation state of bottom waters, *Paleoceanography*, 29, 127–142, doi:10.1002/2013PA002492, 2014.
- Rink, S., Kühl, M., Bijma, J., and Spero, H. J.: Microsensor studies of photosynthesis and respiration in the symbiotic foraminifer *Orbulina universa*, *Marine Biology*, 131, 583–595, 1998.
- 40 Rosenthal, Y., Lohmann, G. P., Lohmann, K. C., and Sherrell, R. M.: Incorporation and preservation of Mg in *Globigerinoides sacculifer*: Implications for reconstructing the temperature and  $^{18}O/^{16}O$  of seawater, *Paleoceanography*, 15, 135–145, doi:10.1029/1999PA000415, 2000.

- Russel, A. D., Hönisch, B., Spero, H. J., and Lea, D. W.: Effects of seawater carbonate ion concentration and temperature on shell U, Mg, and Sr in cultured planktonic foraminifera, *Geochimica et Cosmochimica Acta*, 68, 4347–4361, 2004.
- Sadekov, A. Y., Eggins, S. M., and De Deckker, P.: Characterization of Mg/Ca distributions in planktonic foraminifera species by electron microprobe mapping, *Geochemistry, Geophysics, Geosystems*, 6, Q12P06, doi:10.1029/2005GC000973, 5 2005.
- Sadekov, A. Y., Eggins, S. M., De Deckker, P., Ninnemann, U., Kuhnt, W., and Bassinot, F.: Surface and subsurface seawater temperature reconstruction using Mg/Ca microanalysis of planktonic foraminifera *Globigerinoides ruber*, *Globigerinoides sacculifer*, and *Pulleniatina obliquiloculata*, *Paleoceanography*, 24, PA3201, doi:10.1029/2008PA001664, 2009.
- 10 Schiebel, R., and Hemleben, C.: *Planktic Foraminifers in the Modern Ocean*, Springer-Verlag, Berlin Heidelberg, 2017.
- Schlitzer, R.: Ocean data view, <http://odv.awi.de>, 2009.
- Schmidt, G. A.: Error analysis of paleosalinity calculations, *Paleoceanography*, 14, 422–429, doi:10.1029/1999PA900008, 1999.
- Schmidt, G. A., Bigg, G. R., and Rohling, E. J.: “Global Seawater Oxygen-18 Database –v1.21”, 15 <http://data.giss.nasa.gov/o18data>, 1999.
- Schmidt, M. W., Spero, H. J., and Lea, D. W.: Links between salinity variation in the Caribbean and North Atlantic thermohaline circulation, *Nature*, 428, 160–163, doi:10.1038/nature02346, 2004.
- Schönfeld, J., Bahr, A., Bannert, B., Bayer, A. S., Bayer, M., Beer, C., Blanz, T., Dullo, W. C., Flögel, S., Garlicks, T., Haley, B., Hübscher, C., Joseph, N., Kučera, M., Langenbacher, J., Nürnberg, D., Ochsenhirt, W. T., Petersen, A., Pulm, P., 20 Titschack, J., and Troccoli, L.: Surface and Intermediate water hydrography, planktonic and benthic biota in the Caribbean Sea - Climate, Bio and Geosphere linkages (OPOKA), Cruise No. 78, Leg 1, February 22 - March 28, 2009, Colón (Panama) - Port of Spain (Trinidad and Tobago), METEOR-Berichte, 1–196, 2011.
- Schweitzer, P. N., and Lohmann, G. P.: Ontogeny and habitat of modern menardiiform planktonic foraminifera, *Journal of Foraminiferal Research*, 21, 332–346, 1991.
- 25 Shackleton, N. J., Wiseman, J. D. H., and Buckley, H. A.: Non-equilibrium isotopic fractionation between seawater and planktonic foraminiferal tests, *Nature*, 242, 177–179, doi:10.1038/242177a0, 1973.
- Spero, H. J.: Ultrastructural examination of chamber morphogenesis and biomineralization in the planktonic foraminifer *Orbulina universa*, *Marine Biology*, 99, 9–20, 1988.
- Spero, H. J.: Do planktic foraminifera accurately record shifts in the carbon isotopic composition of seawater  $\Sigma\text{CO}_2$ ?, 30 *Marine Micropaleontology*, 19, 275–285, 1992.
- Spero, H. J., and Lea, D. W.: Intraspecific stable isotope variability in the planktic foraminifera *Globigerinoides sacculifer*: Results from laboratory experiments, *Marine Micropaleontology*, 22, 221–234, 1993.
- Spero, H. J., and Lea, D. W.: Experimental determination of stable isotope variability in *Globigerina bulloides*: implications for paleoceanographic reconstructions, *Marine Micropaleontology*, 28, 231–246, 1996.
- 35 Spero, H. J., and Parker, S. L.: Photosynthesis in the symbiotic planktonic foraminifer *Orbulina universa*, and its potential contribution to oceanic primary productivity, *Journal of Foraminiferal Research*, 15, 273–281, 1985.
- Spero, H. J., Bijma, J., Lea, D. W., and Bemis, B. E.: Effect of seawater carbonate concentration on foraminiferal carbon and oxygen isotopes, *Nature*, 390, 497–500, doi:10.1038/37333, 1997.
- Spero, H. J., Mielke, K. M., Kalve, E. M., Lea, D. W., and Pak, D. K.: Multispecies approach to reconstructing eastern 40 equatorial Pacific thermocline hydrography during the past 360 kyr, *Paleoceanography*, 18, 1022, doi:10.1029/2002PA000814, 2003.
- Spero, H. J., Eggins, S. M., Russell, A. D., Vetter, L., Kilburn, M. R., and Hönisch, B.: Timing and mechanism for intratest Mg/Ca variability in a living planktic foraminifer, *Earth and Planetary Science Letters*, 409, 32–42, 2015.

- Spezzaferri, S., Kučera, M., Pearson, P. N., Wade, B. S., Rappo, S., Poole, C. R., Morard, R., and Stalder, C.: Fossil and Genetic Evidence for the Polyphyletic Nature of the Planktonic Foraminifera "Globigerinoides", and Description of the New Genus Trilobatus, PLoS ONE, 10, e0128108, 2015.
- Steinhardt, J., de Nooijer, L. L. J., Brummer, G.-J., and Reichart, G.-J.: Profiling planktonic foraminiferal crust formation, 5 Geochem. Geophys. Geosyst., 16, 2409–2430, doi:10.1002/2015GC005752, 2015.
- Steph, S., Regenberg, M., Tiedemann, R., Mulitza, S., and Nürnberg, D.: Stable isotopes of planktonic foraminifera from tropical Atlantic/Caribbean core-tops: Implications for reconstructing upper ocean stratification, Marine Micropaleontology, 71, 1–19, 2009.
- 10 Tedesco, K., Thunell, R., Astor, Y., Muller-Karger, F.: The oxygen isotope composition of planktonic foraminifera from the Cariaco Basin, Venezuela: Seasonal and interannual variations, Marine Micropaleontology, 62, 180–193, 2007.
- Van Geldern, R., and Barth, J.: Optimization of instrument setup and post-run corrections for oxygen and hydrogen stable isotope measurements of water by isotope ratio infrared spectroscopy (IRIS), Limnology and Oceanography-Methods, 10, 1024–1036, 2012.
- Vergnaud-Grazzini, C.: Non-equilibrium isotopic compositions of shells of planktonic foraminifera in the Mediterranean 15 Sea, Palaeogeography, Palaeoclimatology, Palaeoecology, 20, 263–276, 1976.
- Vidal, V. M. V., Vidal, F. V., Hernández, A. F., Meza, E., and Zambrano, L.: Winter water mass distributions in the western Gulf of Mexico affected by a colliding anticyclonic ring, Journal of Oceanography, 50, 559–588, 1994.
- Vukovich, F. M.: Climatology of Ocean Features in the Gulf of Mexico Using Satellite Remote Sensing Data, Journal of Physical Oceanography, 37, 689–707, doi:10.1175/JPO2989.1, 2007.
- 20 Watanabe, T., Winter, A., and Oba, T.: Seasonal changes in sea surface temperature and salinity during the Little Ice Age in the Caribbean Sea deduced from Mg/Ca and  $^{18}\text{O}/^{16}\text{O}$  ratios in corals, Marine Geology, 173, 21–35, 2001.
- Weiner, S., and Dove, P. M.: An overview of biomineralization processes and the problem of the vital effect, Reviews in Mineralogy and Geochemistry 54, 2003.
- 25 Wilke, I., Bickert, T., Peeters, F. J. C.: The influence of seawater carbonate ion concentration  $[\text{CO}_3^{2-}]$  on the stable carbon isotope composition of the planktic foraminifera species *Globorotalia inflata*, Marine Micropaleontology, 58, 243–258, 2006.
- Wüst, G.: Stratification and circulation in the Antillean-Caribbean basins, Columbia University Press, Palisades, New York, 1964.
- 30 Zeebe, R. E.: An explanation of the effect of seawater carbonate concentration on foraminiferal oxygen isotopes, Geochimica et Cosmochimica Acta, 63, 2001–2007, 1999.
- Zweng, M. M., Reagan, J. R., Antonov, J. I., Locarnini, R. A., Mishonov, A. V., Boyer, T. P., Garcia, H. E., Baranova, O. K., Johnson, D. R., Seidov, D., and Biddle, M. M.: World Ocean Atlas 2013, Volume 2: Salinity, in: NOAA Atlas NESDIS 74, edited: by Levitus, S., and Mishonov, A., 2013.

FIGURES

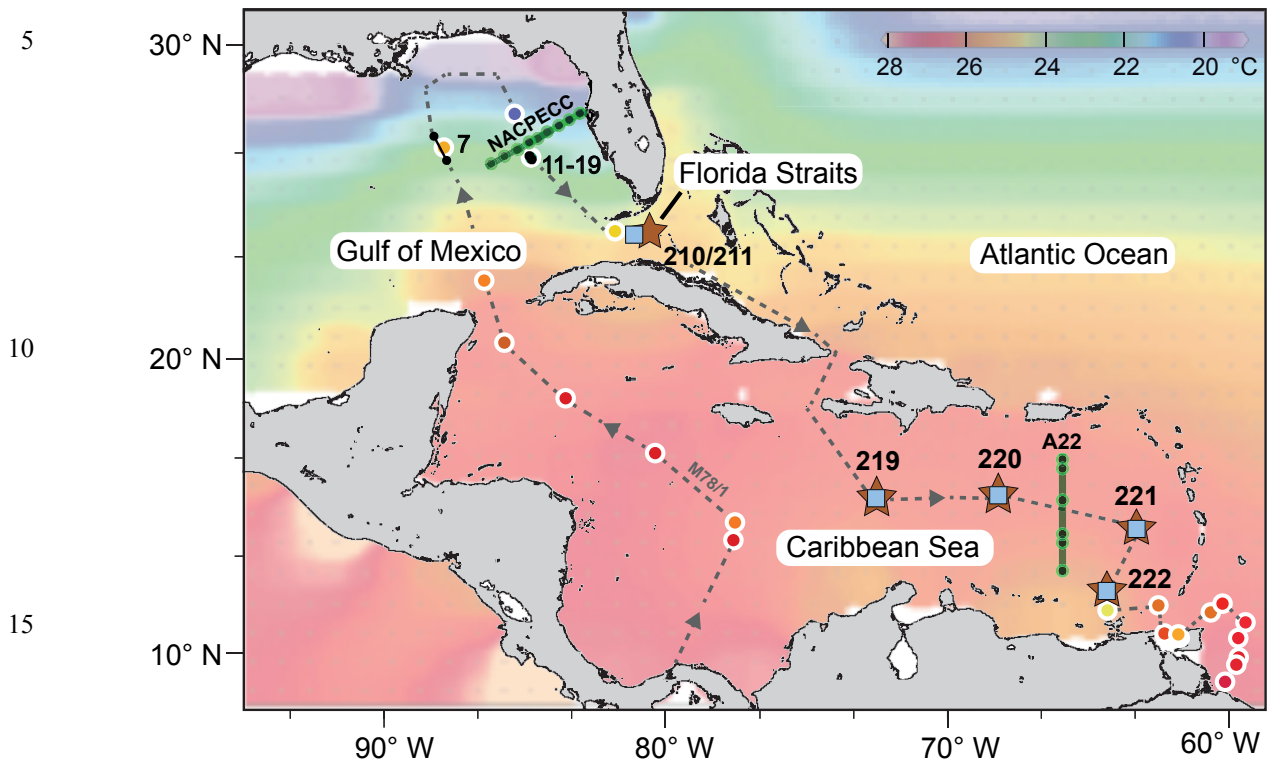

**Figure 1.** Sea surface temperature chart (SST) of the subtropical W-Atlantic (Caribbean Sea, Gulf of Mexico and Florida Straits) showing sampling locations for living planktic foraminifers (Table 1). Brown stars: Multiclosure net samples (MSN) and CTD stations (RV *Meteor* cruise M78/1). Black dots and lines: Plankton filter samples (PF, M78/1). Blue squares: Surface sediment samples (M78/1 and RV *Sonne* cruise SO164, cf. Regenberg et al., 2006; Steph et al., 2009). Green lines and grey dots: World Ocean Circulation Experiment (WOCE) transect line A22 (stations 10–15) and North American Carbon Program (NACP) line NACPECC (stations 20–28) (cchdo.ucsd.edu). Coloured shading: SST illustrated with ODV (Schlitzer, 2009) using World Ocean Atlas 2013 (WOA13) data from January–March (Locarnini et al., 2013). Coloured dots with white outline: SST (3.5 m water depth) recorded during cruise M78/1 with the shipboard thermosalinograph (Schönfeld et al., 2011; Supplement S1). Grey dashed line: Cruise track of RV *Meteor* cruise M78/1 in February and March 2009.

30

35

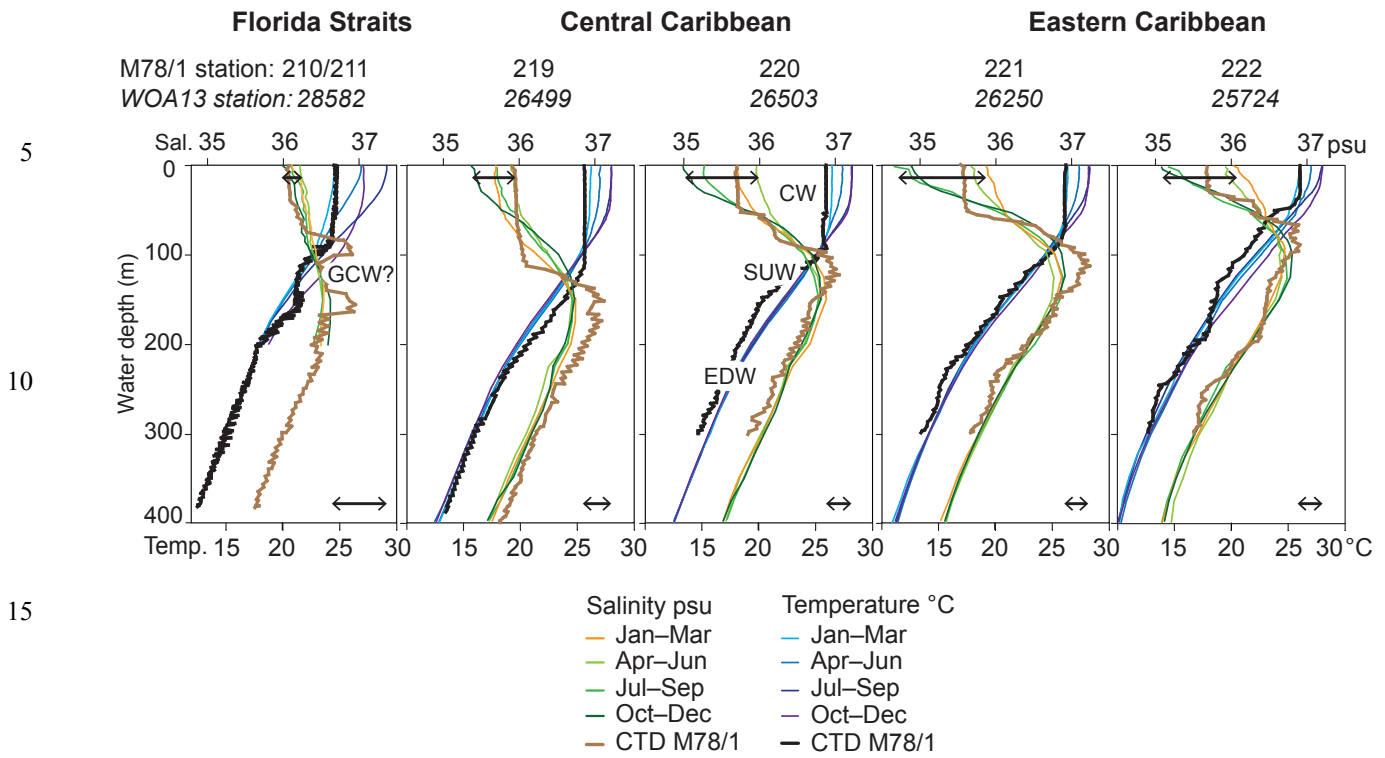

**Figure 2.** Temperature ( $^{\circ}\text{C}$ ) and salinity (psu) depth profiles in the working area. In situ CTD data measured during cruise M78/1 (March 2009, thick brown and black lines) are presented in comparison to the seasonally differentiated World Ocean Atlas 2013 (WOA13) data (Locarnini et al., 2013; Zweng et al., 2013; coloured thin lines). GCW: Gulf Common Water; CW: Caribbean Water; SUW: Subtropical Under Water; EDW:  $18^{\circ}\text{C}$  Sargasso Sea Water. Black double arrows indicate the seasonal ranges of temperature (bottom) and salinity (top) in the uppermost water column (0–10 m water depth).

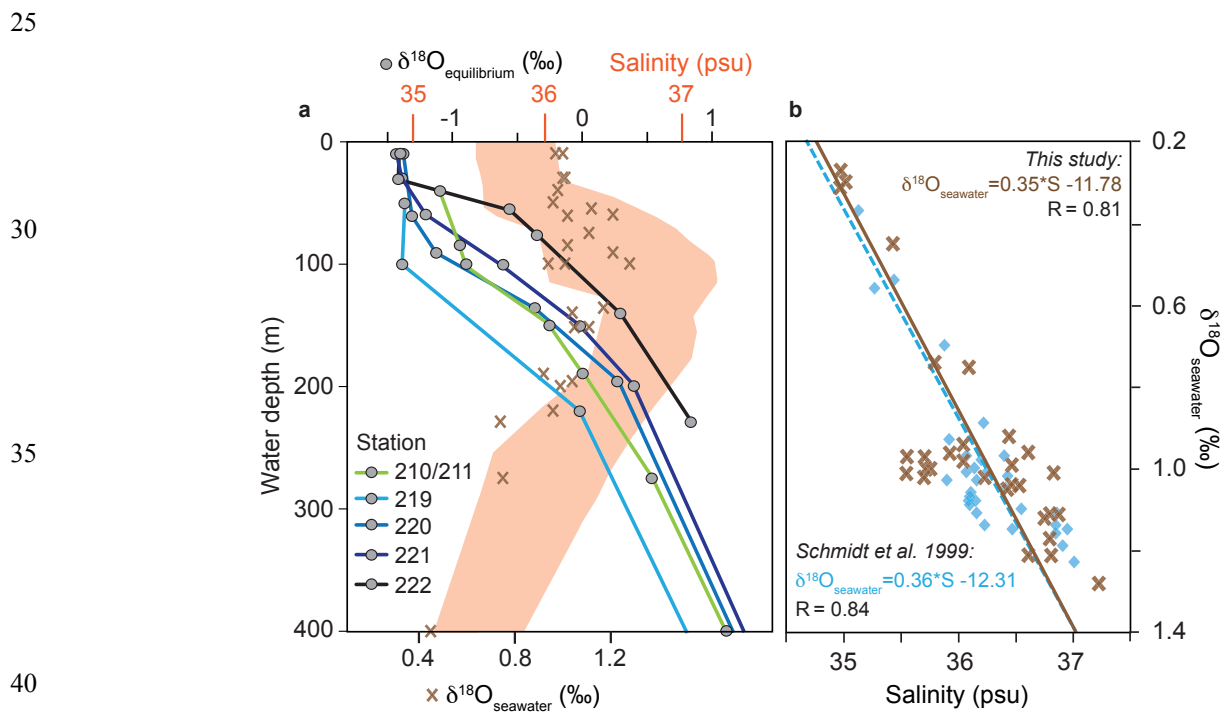

**Figure 3. a)**  $\delta^{18}\text{O}_{\text{seawater}}$  ( $\text{‰}$  VSMOW) and colour-coded  $\delta^{18}\text{O}_{\text{equilibrium}}$  ( $\text{‰}$  PDB) depth profiles at the CTD stations 210/211, 219, 220, 221, and 222 (see Fig. 1). Red shading: Salinity envelope (psu) of the ambient seawater from Florida Straits and Caribbean Sea measured during cruise M78/1 matching  $\delta^{18}\text{O}_{\text{seawater}}$ . **b)** Brown crosses: Measured in situ salinity vs.  $\delta^{18}\text{O}_{\text{seawater}}$ .

$\delta^{18}\text{O}_{\text{seawater}}$  in the Caribbean Sea and Florida Straits in the upper 600 meter of the water column (cf. Supplement S1 for data); blue squares: Salinity vs.  $\delta^{18}\text{O}_{\text{seawater}}$  from Schmidt et al. (1999; Global Seawater Oxygen-18 Database) in the upper 600 meter of the water column in the Caribbean Sea.

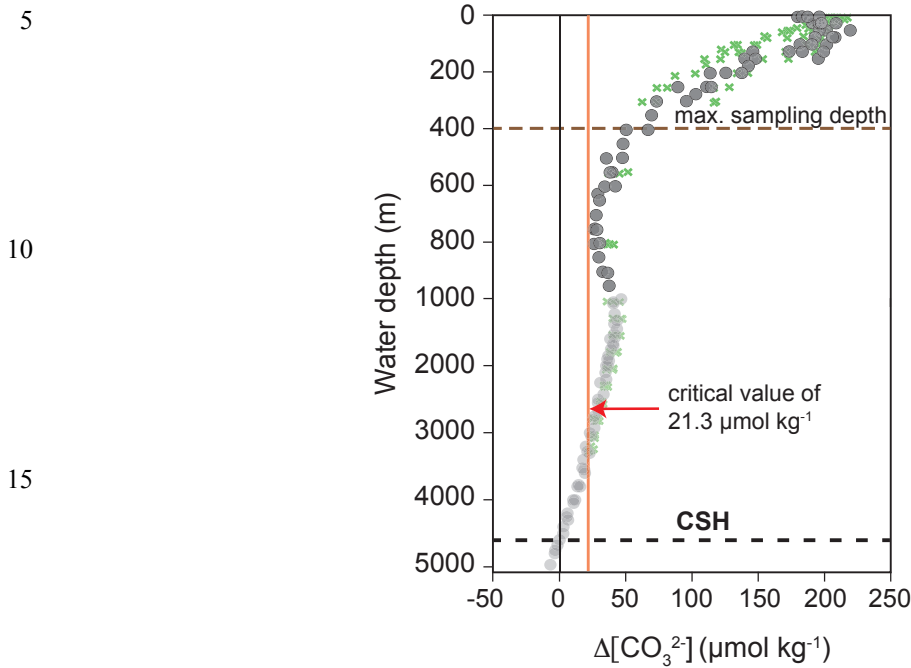

**Figure 4.** Calcite saturation state indicated by  $\Delta[\text{CO}_3^{2-}]$  depth profiles of the Caribbean Sea and Gulf of Mexico. Grey dots and green crosses: Transect A22 (stations 10–15) and NACPECC (stations 20–28) (Fig. 1) with  $\Delta[\text{CO}_3^{2-}]$  being the difference between  $[\text{CO}_3^{2-}]_{\text{in-situ}}$  and  $[\text{CO}_3^{2-}]_{\text{saturation}}$ . Alkalinity and  $\text{TCO}_2$  were taken from WOCE and NACP (cchdo.ucsd.edu; cruise RV *Knorr* in 1997, EXPOCODE: 316N151\_4 and cruise RV *Ronald H. Brown* in 2007, EXPOCODE: 33RO20070710) to calculate  $[\text{CO}_3^{2-}]_{\text{in-situ}}$  using the program CO2SYS (Pierrot et al., 2006; taking the constants ( $K_1$  and  $K_2$ ) of Mehrbach et al. (1973) refitted by Dickson and Millero (1987) and ( $K_{\text{SO}_4}$ ) from Dickson (1990)).  $[\text{CO}_3^{2-}]_{\text{saturation}}$  was calculated after Jansen et al. (2002). Red vertical line indicates the critical  $\Delta[\text{CO}_3^{2-}]$  value of  $21.3 \mu\text{mol kg}^{-1}$  below which selective  $\text{Mg}^{2+}$  ion removal starts (Regenberg et al., 2014); black dashed line marks the calcite saturation horizon (CSH), which is defined to  $0 \mu\text{mol kg}^{-1}$  and represents the top of the lysocline at  $\sim 4600$  m water depth; brown dashed line indicates the maximum plankton tow sampling depth.

30

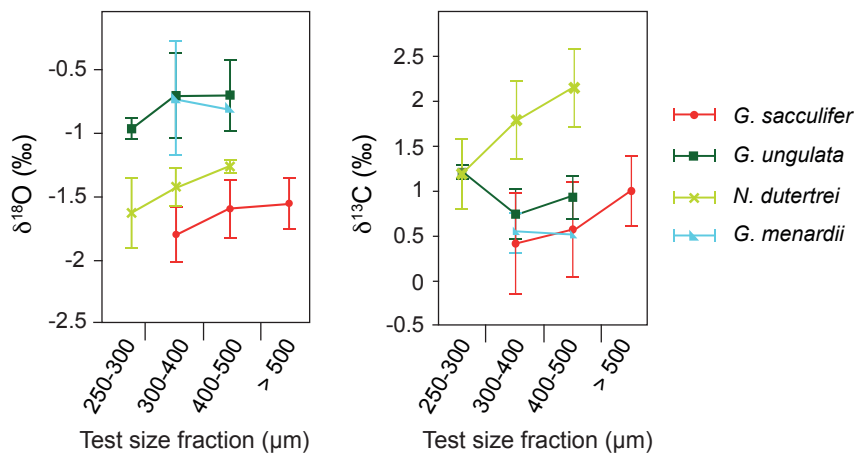

35

40

**Figure 5.** Stable oxygen and carbon isotopes (average  $\delta^{18}\text{O}_{\text{calcite}}$  and  $\delta^{13}\text{C}_{\text{calcite}} \pm$  standard deviations) compared to different test size fractions of living planktic foraminifers (only species with more than one analysed test size fractions are depicted).

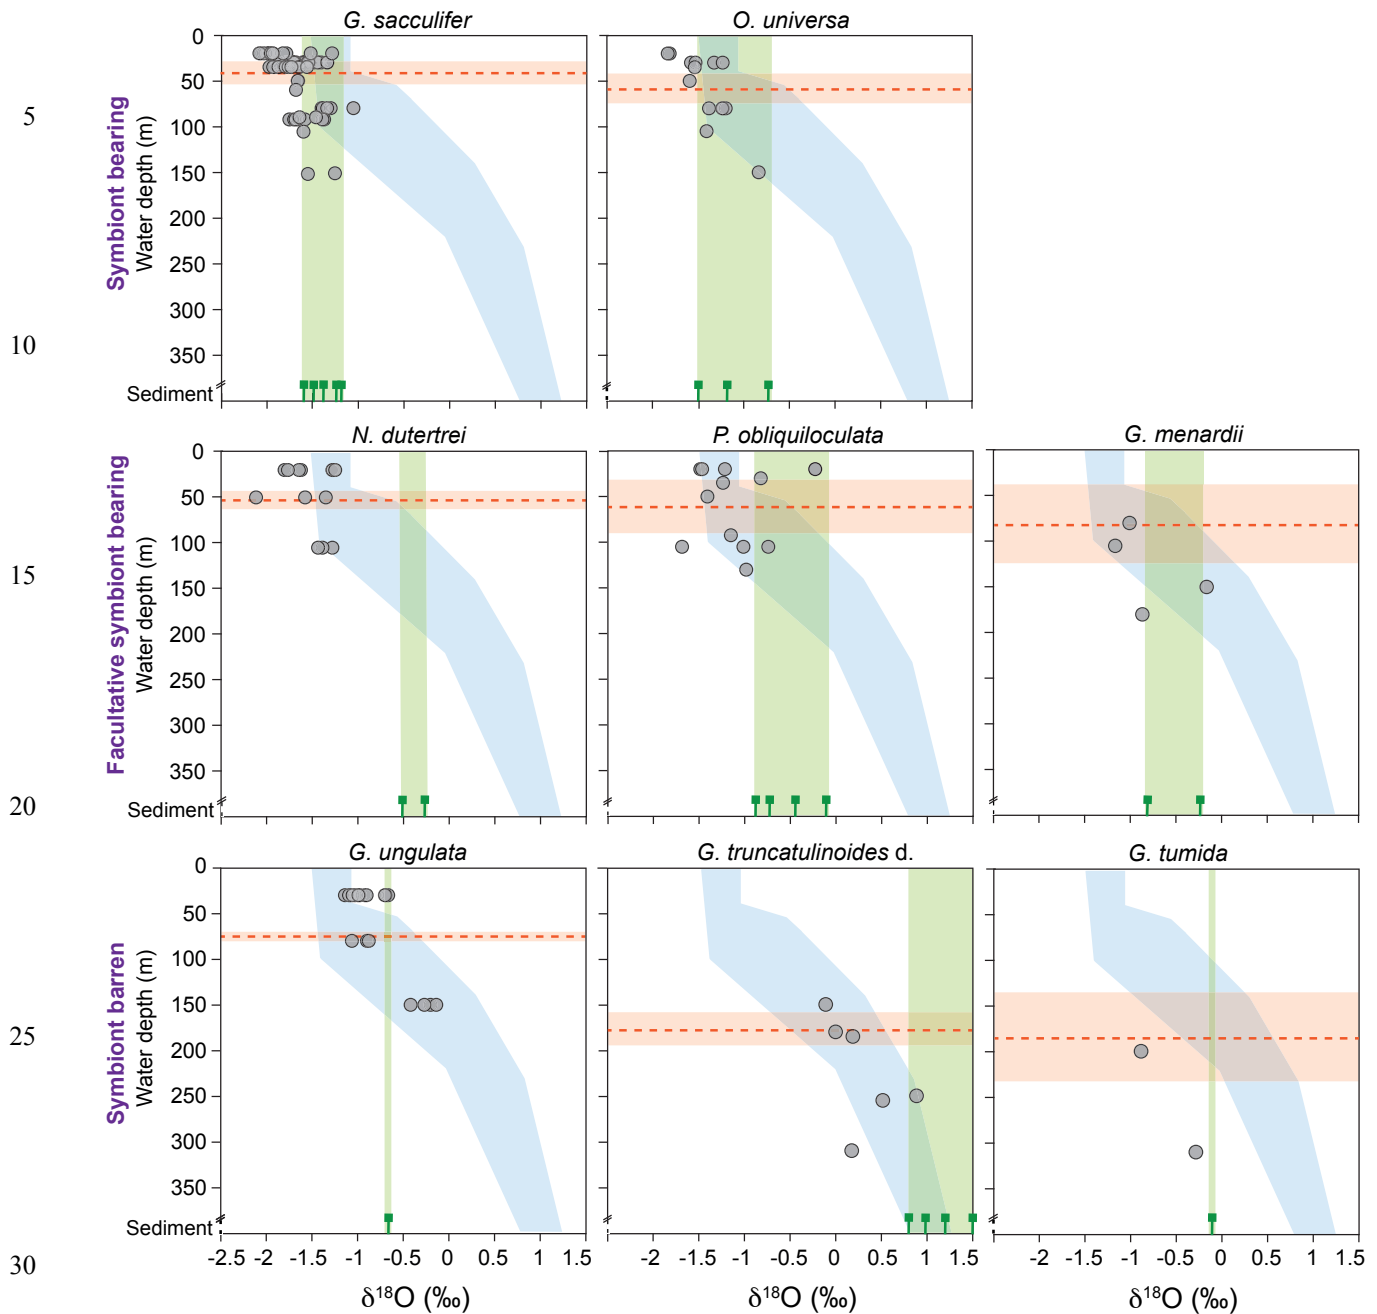

**Figure 6.** Stable oxygen isotopes of living planktic foraminifers from Florida Straits and the Caribbean Sea plotted vs. water depth (m) in comparison to calculated  $\delta^{18}\text{O}_{\text{equilibrium}}$  and surface sediment data (illustrating the “vital effect”). The foraminiferal dataset was differentiated into symbiont bearing, facultative symbiont bearing, and symbiont barren species from top to bottom (Table 2; see Supplement S1 for data). Grey dots: Foraminiferal  $\delta^{18}\text{O}_{\text{calcite}}$  from MSN samples, plotted at the mean sampling depth intervals. Blue shading:  $\delta^{18}\text{O}_{\text{equilibrium}}$  envelope of the ambient seawater from Florida Straits and the Caribbean Sea (cf. Fig. 3a). Green bars: Range of  $\delta^{18}\text{O}_{\text{calcite}}$  of fossil tests from surface sediments (green signs = average values of single stations; cf. Supplement S1). Red dashed lines: Average weighted living depths of single species during the sampling campaign in February/March 2009 (red shaded bars = the standard deviations; Table 2). Note, all test size fractions are included.



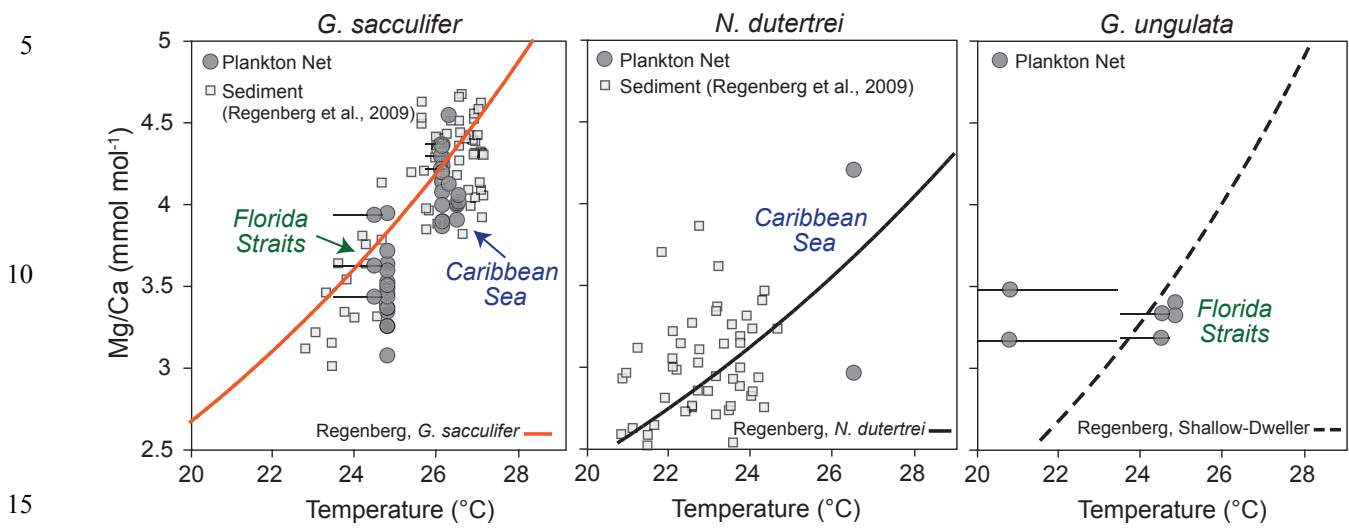

**Figure 7.** Mg/Ca values of ICP-OES bulk samples vs. temperature. Grey dots: Mg/Ca values of living specimens (*G. sacculifer*, *N. dutertrei* and *G. unguolata*), depicted at the average in situ temperature of the plankton net intervals (MSN) in the Florida Straits and Caribbean Sea recorded during cruise M78/1. Black error bars: Modern temperature ranges of the sampling intervals. Grey squares: Mg/Ca ratios of fossil tests vs.  $\delta^{18}\text{O}$  calcification temperature from the Caribbean Sea and tropical Atlantic modified after Regenberg et al. (2009). Orange curve: Mg/Ca calibration of Regenberg et al. (2009) (surface sediments) for *G. sacculifer*. Black curve: Mg/Ca calibration of Regenberg et al. (2009) for *N. dutertrei*. Dashed black curve: Mg/Ca calibration of Regenberg et al. (2009) for shallow dwellers.

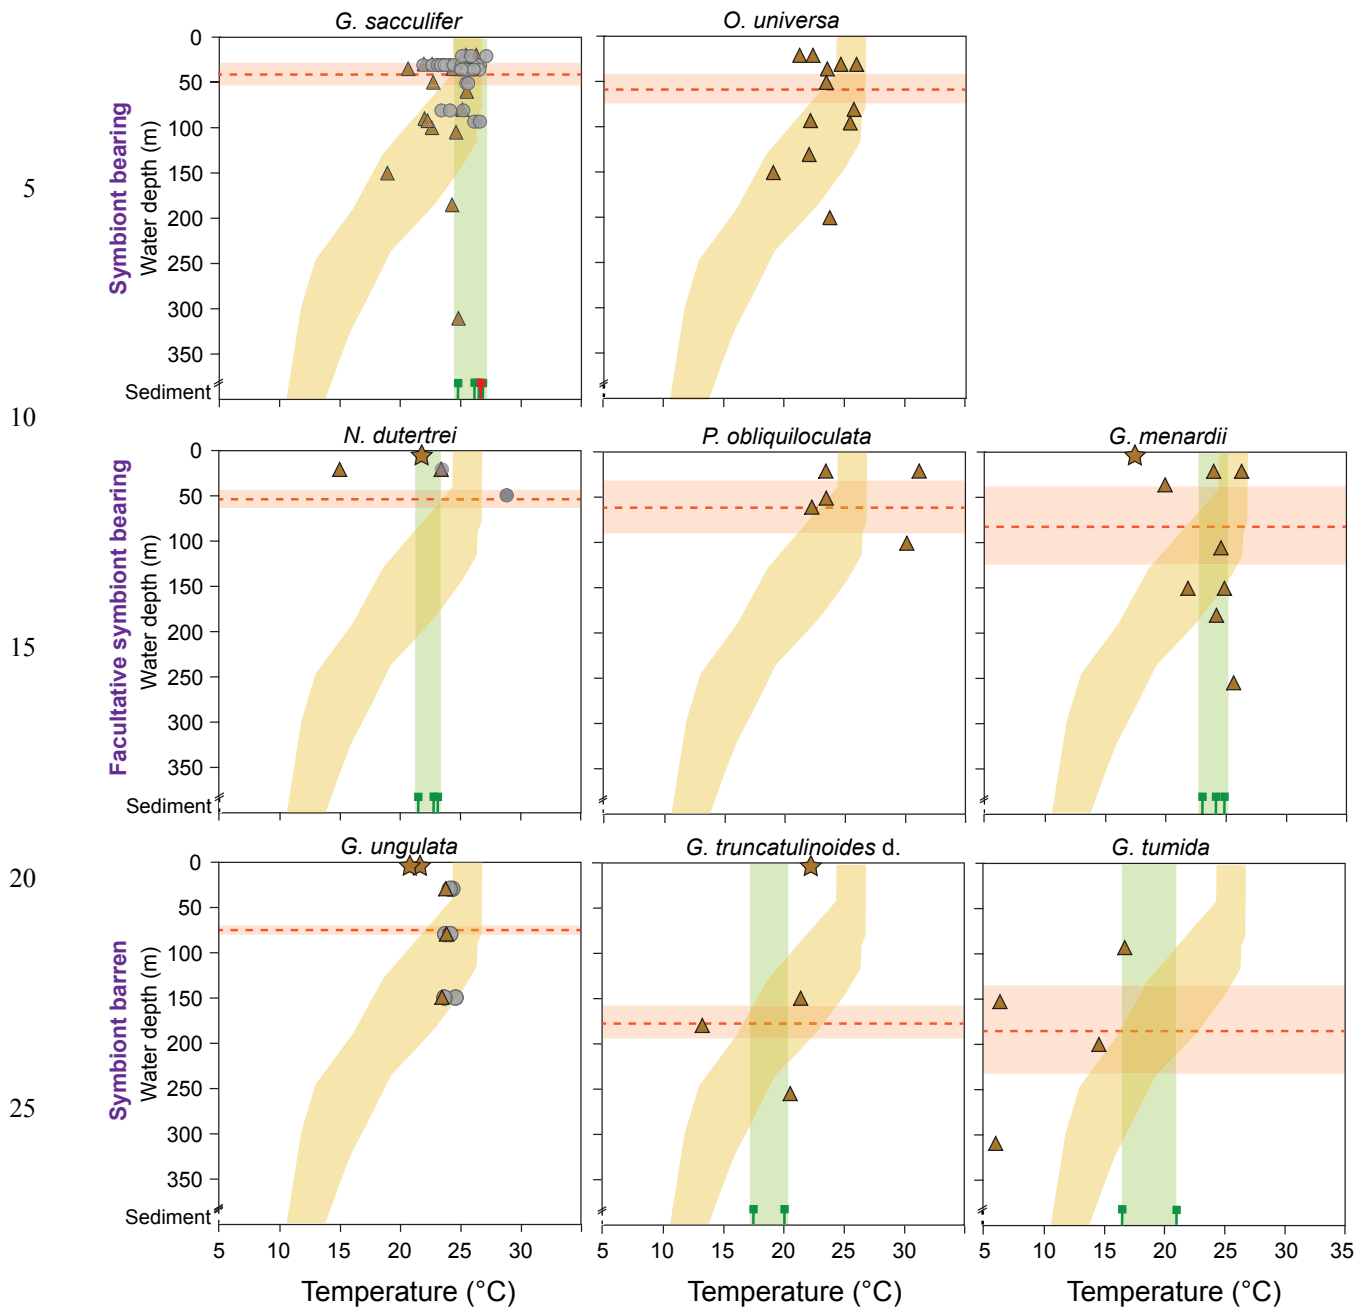

30 **Figure 8.** Mg/Ca derived temperature estimates of living planktic foraminifers combined from Florida Straits, the eastern Gulf of Mexico and the Caribbean Sea in comparison to the ambient seawater temperature. The foraminiferal dataset was differentiated into symbiont bearing, facultative symbiont bearing, and symbiont barren species from top to bottom (Table 2; cf. Supplement S1 for data). Grey dots: Mg/Ca-temperature estimates from bulk foraminiferal MSN samples measured by ICP-OES, depicted at the mean sampling depth intervals. Brown triangles and stars: Mg/Ca-temperature estimates derived from LA-ICP-MS measurements of single tests from MSN samples (Caribbean Sea and Florida Straits) and PF samples (Gulf of Mexico), respectively (average values, cf. Supplement S1). Yellow shading: Temperature envelope (°C) of the ambient seawater from Florida Straits and the Caribbean Sea measured during cruise M78/1 (Fig. 2; Schönfeld et al., 2011). Note: PF samples (brown stars) were taken in 3.5 m water depth in the eastern Gulf of Mexico at SST of 20 °C during cruise M78/1 (Fig. 1). Green bars: Mg/Ca derived temperature range of fossil bulk foraminiferal samples from surface sediments closest to the MSN (Green sign: Average values of single stations in the Caribbean Sea; Red sign: average value of *G. sacculifer* in the Florida Straits, cf. Supplement S1). Red dashed lines: Average weighted living depths of single species during the sampling campaign in February/March 2009 (red bars= standard deviation; Table 2). Note, all test size fractions are included.

35

40

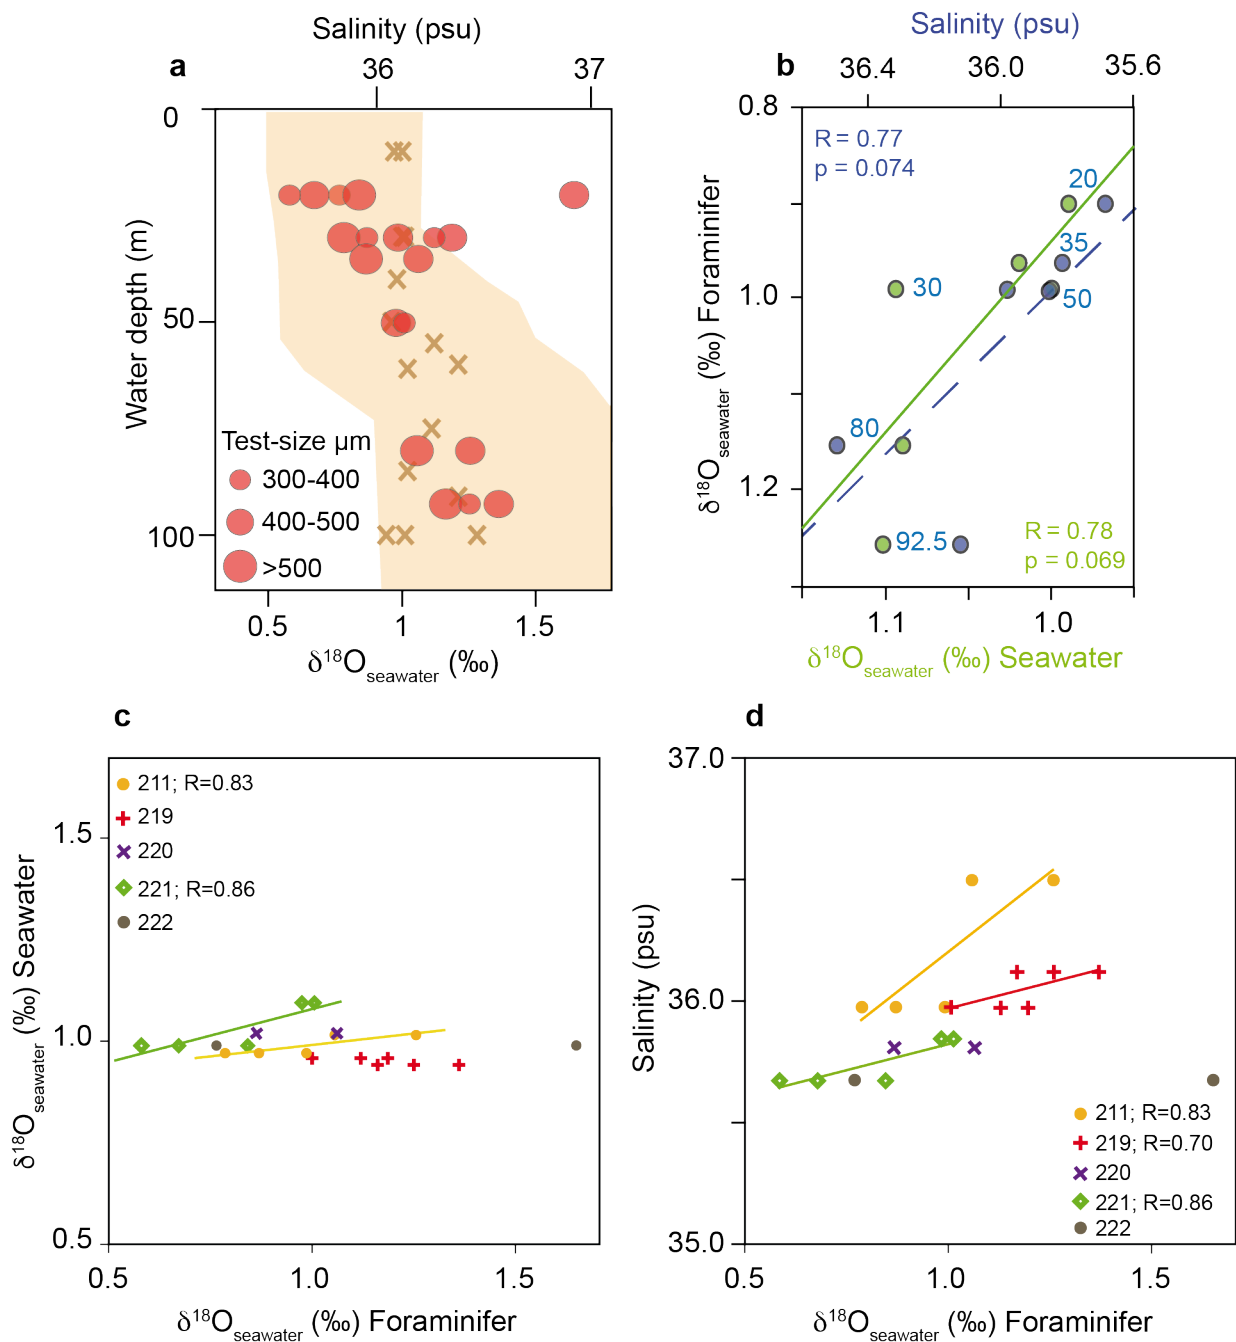

5 **Figure 9.**  $\delta^{18}\text{O}_{\text{seawater}}$ -estimates based on foraminiferal tests from living *G. sacculifer* compared to measured  $\delta^{18}\text{O}_{\text{seawater}}$  and salinity recorded during cruise M78/1 in the Caribbean Sea and Florida Straits. **a)** Red dots: Average  $\delta^{18}\text{O}_{\text{seawater}}$ -estimates of bulk samples from different test size fractions; brown crosses: in situ  $\delta^{18}\text{O}_{\text{seawater}}$  (‰ VSMOW); orange envelop: Salinity. **b)** Relationship between average  $\delta^{18}\text{O}_{\text{seawater}}$ -estimates (foraminiferal tests), measured  $\delta^{18}\text{O}_{\text{seawater}}$  (seawater) and measured in situ salinity. Blue and green dots indicate average values at a specific water depth (blue numbers denote average sampling water depth in m). **c)** Relationship between  $\delta^{18}\text{O}_{\text{seawater}}$ -estimates (foraminiferal tests) and measured  $\delta^{18}\text{O}_{\text{seawater}}$  (seawater) for each station. **d)** Relationship between  $\delta^{18}\text{O}_{\text{seawater}}$ -estimates (foraminiferal tests) and measured salinity for each station.

10

**TABLES**

**Table 1.** Station list of sediment, water and plankton samples obtained during cruises SO164 and M78/1 (Nürnberg et al., 2003; Schönfeld et al., 2011). MUC: Multicorer; GKG: Giant box corer; CTD: Conductivity Temperature Depth profiler; MSN: Hydrobios Midi multiple opening-closing plankton net; PF: Plankton filter. \*indicates surface sediment sites close to MSN station (1) 219, (2) 220, (3) 221 and (4) 211 (Fig. 1).

| Cruise | Date       | Device | Station No.    | Latitude N (Start-End) | Longitude W (Start-End) | Water depth (m) | Sampling intervals/depth                  |
|--------|------------|--------|----------------|------------------------|-------------------------|-----------------|-------------------------------------------|
| SO164  | 27.05.2002 | MUC    | 02-3 *(1)      | 15°18.29               | 72°47.06                | 2977            | 0–1 cm                                    |
| SO164  | 07.06.2002 | MUC    | 22-2 *(2)      | 15°24.00               | 68°12                   | 4506            | 0–1 cm                                    |
| SO164  | 09.06.2002 | MUC    | 24-3 *(3)      | 14°11.89               | 63°25.43                | 1545            | 0–1 cm                                    |
| M78/1  | 10.03.2009 | MUC    | 212-1 *(4)     | 24°11.10               | 81°15.74                | 723             | 0–1 cm                                    |
| M78/1  | 19.03.2009 | GKG    | 222-8          | 12°1.48                | 64°28.50                | 1019            | surface                                   |
| M78/1  | 10.03.2009 | CTD    | 210-13         | 24°14.88               | 80°55.10                | 452             | 40, 85, 100, 150, 190, 275, 400 m         |
| M78/1  | 10.03.2009 | CTD    | 211            | 24°15.50               | 80°54.81                | 456             | -                                         |
| M78/1  | 15.03.2009 | CTD    | 219-1          | 15°18.27               | 72°47.08                | 2956            | 50, 100, 220, 600 m                       |
| M78/1  | 16.03.2009 | CTD    | 220-1<br>220-2 | 15°23.99<br>15°23.99   | 68°12.01<br>68°11.99    | 4480<br>4480    | 10, 61, 91, 136, 196, 485 m               |
| M78/1  | 18.03.2009 | CTD    | 221-1<br>221-2 | 14°11.89<br>14°11.98   | 63°25.45<br>63°25.41    | 1534<br>1534    | 10, 30, 60, 100, 150, 200, 500 m          |
| M78/1  | 19.03.2009 | CTD    | 222-1          | 12°1.49                | 64°28.55                | 1023            | 10, 30, 55, 75, 140, 229 m                |
| M78/1  | 10.03.2009 | MSN    | 211-5<br>211-6 | 24°15.50<br>24°15.30   | 80°54.81<br>80°54.69    | 456<br>453      | 0–60, 60–100, 100–200, 200–300, 300–400 m |
| M78/1  | 15.03.2009 | MSN    | 219-7<br>219-8 | 15°18.30<br>15°18.30   | 72°47.06<br>72°47.06    | 2960<br>2960    | 0–60, 60–125, 125–180, 180–220, 220–400 m |
| M78/1  | 17.03.2009 | MSN    | 220-8<br>220-9 | 15°23.99<br>15°23.99   | 68°12.00<br>68°12.00    | 4481<br>4482    | 0–70, 70–110, 110–150, 150–220, 220–300 m |
| M78/1  | 18.03.2009 | MSN    | 221-7<br>221-8 | 14°11.89<br>14°11.89   | 63°25.43<br>63°25.43    | 1533<br>1535    | 0–40, 40–60, 60–150, 150–210, 210–300 m   |
| M78/1  | 19.03.2009 | MSN    | 222-6<br>222-7 | 12°1.57<br>12°1.55     | 64°28.80<br>64°28.80    | 1031<br>1028    | 0–40, 40–80, 80–120, 120–180, 180–300 m   |
| M78/1  | 03.03.2009 | PF     | 7              | 26°31.38–27°39.86      | 87°5.32–88°16.23        | -               | 3.5 m                                     |
| M78/1  | 06.03.2009 | PF     | 11             | 26°18.35–26°12.21      | 84°44.97–84°41.92       | -               | 3.5 m                                     |
| M78/1  | 06.03.2009 | PF     | 12             | 26°10.7–26°12.48       | 84°44.08–84°43.40       | -               | 3.5 m                                     |
| M78/1  | 07.03.2009 | PF     | 19             | 26°12.18–26°12.18      | 84°43.87–84°43.87       | -               | 3.5 m                                     |

**Table 2.** Average weighted living depth (m), habitat temperature (°C), symbionts information and  $\delta^{18}\text{O}_{\text{disequilibrium}}$  values of single species from this study and other authors.

| Species                              | Avg. living depth (m) <sup>x</sup> | Avg. habitat temperature (°C) <sup>x</sup> | Disequilibrium values                         |                                                |
|--------------------------------------|------------------------------------|--------------------------------------------|-----------------------------------------------|------------------------------------------------|
|                                      |                                    |                                            | $\delta^{18}\text{O}_{\text{calcite}}$        | $\delta^{18}\text{O}_{\text{equilibrium}}$ (‰) |
| <i>G. sacculifer</i>                 | 41±9                               | 25.9                                       | -0.36 to -0.03<br>-0.13 to -0.16 <sup>+</sup> | -0.39                                          |
| <i>N. duerrei</i>                    | 54±10                              | 25.11                                      | -1.57 to -0.29 <sup>+</sup>                   | -0.11                                          |
| <i>O. universa</i>                   | 58±16                              | 25.13                                      | -0.95                                         |                                                |
| <i>P. obliquiloculata</i>            | 61±29                              | 25.61                                      | -0.24 to 0 <sup>+</sup>                       | +0.06                                          |
| <i>G. unguilata</i>                  | 75±5                               | 23.81                                      | -0.24 to 0 <sup>+</sup>                       |                                                |
| <i>G. menardi</i>                    | 81±43                              | 24.47                                      | -0.24 to 0 <sup>+</sup>                       |                                                |
| <i>G. truncatulinoides</i>           | 176±18 <sup>d</sup>                | 20.14 <sup>d</sup>                         | -0.1 to +0.16 <sup>++</sup>                   |                                                |
| <i>G. tumida</i>                     | 185±49                             | 21.72                                      | <0                                            |                                                |
| Symbionts                            |                                    |                                            |                                               |                                                |
| Mixed layer*                         |                                    |                                            |                                               |                                                |
| Thermocline*                         |                                    |                                            |                                               |                                                |
| Bouvier-Soumagnac and Duplessy, 1985 |                                    |                                            |                                               |                                                |
| Duplessy et al., 1981a               |                                    |                                            |                                               |                                                |
| Erez and Honjo, 1981 <sup>#</sup>    |                                    |                                            |                                               |                                                |
| Vergnaud-Grazzini, 1976              |                                    |                                            |                                               |                                                |
| Kahn, 1979                           |                                    |                                            |                                               |                                                |
| Lontaric et al., 2006                |                                    |                                            |                                               |                                                |
| Shackleton et al., 1973              |                                    |                                            |                                               |                                                |

\* This study (average values); <sup>x</sup> Jenzen et al. (accepted); <sup>d</sup> *G. truncatulinoides* dextral  
<sup>1</sup> = Gástrich, 1987; <sup>2</sup> = Bø, 1977; <sup>3</sup> = Kucera, 2007  
<sup>F</sup> = Facultative symbionts  
<sup>+</sup> = large/thick specimens; <sup>++</sup> = seasonal variations

**Table 3.** Average values of  $\delta^{18}\text{O}_{\text{calcite}}$  and Mg/Ca (measured on ICP-OES\* and LA-ICP-MS) from the mixed layer, thermocline and surface sediment (cf. Supplement S1 for data). PF samples are not included in the calculations.

| Species                             | $\delta^{18}\text{O}_{\text{calcite}}$ (‰) |             |          | Mg/Ca (mmol mol <sup>-1</sup> ) |             |                       |
|-------------------------------------|--------------------------------------------|-------------|----------|---------------------------------|-------------|-----------------------|
|                                     | Mixed layer                                | Thermocline | Sediment | Mixed layer                     | Thermocline | Sediment <sup>5</sup> |
| <i>G. sacculifer</i>                | -1.62                                      | -1.52       | -1.38    | 3.87*/ 3.51                     | 3.52        | 4.20*                 |
| <i>P. obliquiloculata</i>           | -1.15                                      | -1.07       | -0.55    | 2.84                            | 2.86        |                       |
| <i>O. universa</i>                  | -1.53                                      | -1.13       | -1.15    | 8.33                            | 7.61        |                       |
| <i>N. dutertrei</i>                 | -1.51                                      | -1.37       | -0.4     | 3.59*/ 2.36                     |             | 2.88*                 |
| <i>G. ungulata</i>                  | -0.95                                      | -0.26       | -0.67    | 3.30*/ 3.20                     | 3.32*/ 3.10 |                       |
| <i>G. menardii</i>                  | -1.01                                      | -0.73       | -0.54    | 3.10                            | 3.19        | 3.27*                 |
| <i>G. tumida</i>                    |                                            | -0.58       | -0.11    | 2.45                            | 1.80        | 2.68*                 |
| <i>G. truncatulinoides</i> d.       |                                            | 0.28        | 1.13     |                                 | 2.5         | 2.52*                 |
| *Bulk samples (measured on ICP-OES) |                                            |             |          |                                 |             |                       |
